# 1 **Abstract**

2 **Background:** Concerns have been expressed about a number of drugs that  
3 potentially worsen outcomes in patients with COVID-19. We sought to identify all  
4 potentially deleterious drug groups in COVID-19 and critically assess the  
5 underpinning strength of evidence pertaining to the harmful effects of these drugs.

6 **Methods and findings:** We performed a rapid systematic review, searching  
7 Medline, Embase and two COVID-19 portfolios (WHO COVID-19 database and  
8 NIH iSearch COVID-19 portfolio) for papers and preprints related to primary  
9 studies investigating drugs identified as potentially deleterious. Primary outcomes  
10 were direct measures of susceptibility to infection, disease severity and mortality.  
11 Study quality was assessed using the National Heart, Lung, and Blood Institute  
12 quality assessment tools. Random-effects meta-analyses were used for data  
13 synthesis with further subgroup analyses where possible for specific outcome, study  
14 design, statistical adjustment and drug groups when two were combined.  
15 Sensitivity analyses were performed by removing any studies at high risk of bias  
16 and by publication status.

17 49 observational studies (15 peer-reviewed papers and 34 preprints) reported  
18 primary outcomes for eight drug groups hypothesised to be deleterious. Meta-  
19 analysis showed that acute inpatient corticosteroid use was associated with  
20 increased mortality (OR 2.22, 95% CI 1.26-3.90), however this result appeared to  
21 have been biased by confounding via indication. One subgroup analysis indicated  
22 an association between immunosuppressant use and susceptibility to COVID-19  
23 among case control and cross-sectional studies (OR 1.29, 95% CI 1.19-1.40) but this  
24 was not found with cohort studies (OR 1.11, 95% CI 0.86-1.43). Studies which  
25 adjusted for multiple confounders showed that people taking angiotensin-  
26 converting-enzyme inhibitors (ACEIs) or angiotensin-II-receptor blockers (ARBs)  
27 required a lower level of care (OR 0.85, 95% CI 0.74-0.98). Furthermore, studies

1 which combined these two drug groups in their analysis demonstrated an  
2 association with a lower mortality (OR 0.68, 95% CI 0.55-0.85).

3 **Conclusions:** We found minimal high quality or consistent evidence that any drug  
4 groups increase susceptibility, severity or mortality in COVID-19. Converse to initial  
5 hypotheses, we found some evidence that regular use of ACEIs and ARBs prior to  
6 infection may be effective in reducing the level of care required, such as requiring  
7 intensive care, in patients with COVID-19.

8

# 1 Introduction

2 The ongoing Coronavirus 2019 (COVID-19) pandemic has already had a profound  
3 global impact. As of 3<sup>rd</sup> March 2021, there had been over 114 million confirmed  
4 cases and over 2.5 million deaths worldwide (1). SARS-CoV-2 is one of seven  
5 coronaviruses known to infect humans (2). It is, together with severe acute  
6 respiratory syndrome coronavirus (SARS-CoV) and the Middle East respiratory  
7 syndrome coronavirus (MERS-CoV), also one of three zoonotic human  
8 betacoronaviruses to have emerged in the last 20 years (3). The genome sequence of  
9 SARS-CoV-2 was found to be 79% similar to SARS-CoV (4); both viruses enter  
10 human cells via angiotensin-converting enzyme 2 (ACE2), a factor linked to human-  
11 to-human transmission (5). ACE2 received considerable attention following its  
12 discovery as the entry for SARS-CoV, and has previously been purported to play a  
13 protective role in disease, as opposed to the deleterious role of angiotensin-  
14 converting enzyme (ACE) (6). Conversely, some hypothesized that drugs which  
15 upregulate ACE2 may increase the risk of severe SARS-CoV-2 infection (7).

16 Approximately five percent of known COVID-19 cases require admission to an  
17 intensive care unit (ICU) (8). Many of these patients develop acute respiratory  
18 distress syndrome (ARDS) and require mechanical ventilation (MV) or other  
19 respiratory support (9). Cytokine storms (a large release of pro-inflammatory  
20 proteins) have been implicated in the development of ARDS, as well as multi-organ  
21 failure, with a correlation between cytokine levels and mortality (10).

22 Since the beginning of the pandemic, both expert opinion and small-scale  
23 observational studies have contributed to a number of drug groups being  
24 postulated to alter the progression of the disease, whether positively or negatively.  
25 At various times, conflicting advice regarding non-steroidal anti-inflammatory  
26 drugs (NSAIDs) (11-13), corticosteroids (14, 15) and other immunosuppressants (16-  
27 18), ACE Inhibitors (ACEIs) and Angiotensin Receptor Blockers (ARBs) (19) have

1 been reported in the scientific literature and media, leading to considerable  
2 confusion for both patients and healthcare professionals.

3 Especially during the early stages of the pandemic, most of the advice stemmed  
4 from outcomes in other respiratory infections including severe acute respiratory  
5 syndrome (SARS) (20, 21) and Middle East respiratory syndrome (MERS) (14) or  
6 hypotheses based on the mechanism of viral entry into cells (19, 22, 23) and general  
7 effects on immunity (17, 18). In addition, many scientific papers have been  
8 published prior to peer review to speed up information sharing, which has led to  
9 questions surrounding the scientific validity of some of these findings (24).

10 We aimed to identify, critically appraise and synthesise the evidence on drugs  
11 which may be deleterious in COVID-19.

## 12 **Methods**

13 This study is reported as per PRISMA guidelines on the reporting of systematic  
14 reviews (25). In response to the exponential rate at which new research on this topic  
15 is being published, a rapid review methodology was adopted following the  
16 Cochrane rapid review protocol (26) with the aim of producing reliable results in a  
17 timely fashion.

## 18 **Search strategy**

19 As the availability of studies increased, our search strategy evolved iteratively to  
20 capture as much as possible of the available evidence base. This study consisted of a  
21 three-stage search strategy involving literature from four databases using the  
22 PECOS format (Population, Exposure, Comparison, Outcome, Study design):  
23 Embase, Medline, World Health Organization (WHO) COVID-19 Database (27) and  
24 National Institutes for Health (NIH) iSearch COVID-19 Portfolio (28). The searches  
25 were performed in April 2020 and included all papers between December 2019 and  
26 April 2020. We first searched the Medline and Embase databases simultaneously  
27 through Ovid, using a combination of Medical Subject Headings (MESH) and

1 keywords, to capture papers related to the drugs already identified as potentially  
2 harmful in exploratory searches, as well as a string to identify new drugs.  
3 (Appendix 1: search terms). The primary goal of this search was to amass a list of  
4 drugs hypothesized as potentially harmful in COVID-19 in order to inform the  
5 subsequent searches.

6 The second search was performed on the WHO COVID-19 Database (27), a database  
7 aimed at compiling all the available publications on COVID-19. This search used  
8 terms to capture evidence related to all drugs identified prior to the second search.

9 Due to the rapidity of emerging evidence, we felt we could not rely solely on peer-  
10 reviewed publications as this would severely limit our findings and we decided to  
11 include preprints a priori, which at the time were the primary source of information  
12 available on COVID-19 epidemiology and pharmacovigilance (29). The third and  
13 final search was, therefore, undertaken for preprints on the NIH iSearch COVID-19  
14 Portfolio database, which included Research Square, medRxiv, chemRxiv, arXiv,  
15 bioRxiv and Social Science Research Network. This search was screened for primary  
16 data only.

## 17 **Screening**

18 As per the Cochrane rapid review guidelines (26) , all abstracts were screened by the  
19 first reviewer (MH). A second reviewer screened any excluded papers (SM and CH),  
20 while a third reviewer helped to settle any disagreements (UP). All studies included  
21 were then screened as a full text in the same manner, with all included full texts  
22 being moved on to extraction. Finally, this process was repeated for reference lists  
23 from all relevant systematic reviews identified from the searches.

24 The first two searches were initially screened with the aim of capturing a  
25 comprehensive list of drugs hypothesized to be harmful and therefore included  
26 opinion pieces. These searches were then screened a second time for papers with  
27 primary data using a second set of inclusion and exclusion criteria (Appendix 2:

1 inclusion & exclusion criteria). The third search was screened only for primary data  
2 using the second set of criteria.

### 3 **Data extraction**

4 Data extraction was performed using a tailored data extraction template designed to  
5 capture relevant data pertaining to study design, setting, demographics and  
6 findings (Appendix 5). Data from each study were extracted by the first reviewer  
7 (MH) and checked independently by a second reviewer (UP).

### 8 **Quality assessment**

9 Quality assessment was performed using the National Heart, Lung, and Blood  
10 Institute (NHLBI) checklists (30). We chose this tool for three reasons: it is a  
11 validated and reliable tool; it contains checklists to assess a large range of  
12 observational study designs;(13) and it is relatively simple and quick to administer  
13 in comparison to other quality assessment tools, which aligned with the rationale  
14 for adopting a rapid review methodology. Two of the four reviewers (MH and  
15 SM/CH/UP) checked the quality of each study against the relevant checklist and  
16 reached consensus through discussion when in disagreement.

17 No formal assessment of strength of evidence by outcome was undertaken;  
18 however, we considered our findings in line with the key aspects of the grading of  
19 recommendations assessment, development and evaluation (GRADE) (31).

### 20 **Outcome definitions**

21 Drug group analysis was split into three categories: susceptibility to infection;  
22 severity of disease; and mortality. Susceptibility was defined as testing positive,  
23 clinical diagnosis or hospitalisation (if compared with untested individuals) as these  
24 all compared case numbers against those without the disease. Severity of disease  
25 was split further where possible into either a diagnostic index or level of care.  
26 Diagnostic index of severity was defined as any combination of factors used to

1 differentiate severe or critical disease from mild or moderate, or diagnostic criteria  
2 for ARDS. Level of care was defined as hospitalisation (if compared with  
3 community care of COVID-19 cases), ventilation (mechanical or non-invasive  
4 ventilation), ICU care or mortality in combination with other outcomes including  
5 remaining as an inpatient. Mortality was defined as any measure of mortality  
6 outside of or within hospital, either within a set time frame or at any point during  
7 data collection.

8 Although hospitalisation rates would normally imply more severe disease than  
9 simply testing positive, in many countries testing was largely only available in  
10 hospitals (32-34). If a study compared those admitted to hospital due to COVID-19  
11 with untested individuals, this was considered analogous with testing positive for  
12 the purpose of analysis. However, if the control group contained positive cases  
13 tested in the community, then this was considered as requiring a higher level of  
14 care.

15 Due to the common pathway affected by both ACEIs and ARBs , and the  
16 recommendation against co-prescription (35), these drug groups were combined in  
17 analyses. Henceforth, when combined, ACEIs and ARBs will be referred to as renin-  
18 angiotensin-aldosterone blockers (RAASBs).

19 For the purposes of this review, we considered immunosuppressants as a class of  
20 drugs used primarily to suppress the human immune system. Most included  
21 studies investigated immunosuppressants in this manner, although some studies  
22 analysed individual immunosuppressants. Where corticosteroids were grouped  
23 together with other immunosuppressants, these studies were included here.

## 24 **Narrative synthesis**

25 For groups of outcomes for a particular drug group that had fewer than four effect  
26 estimates with calculable and relevant odds ratios (ORs), these were synthesised



1 narratively. Study description tables were used to summarise study characteristics  
2 and compare findings.

### 3 **Statistical analysis**

4 Any drug groups with a sufficient number of comparable studies were synthesised  
5 using meta-analyses. Considering the implications of random-effects models on  
6 statistical power (36), outcomes were deemed eligible for meta-analysis if more than  
7 four studies were identified that investigated the same drug group. When sufficient  
8 numbers of results were available, these were then run with sub-group analyses to  
9 attempt to address any heterogeneity in the results and investigate which  
10 confounding factors may have affected findings. The subgroup analyses included  
11 study design, level of adjustment for confounders, acute doses or regular users, the  
12 two subsets of disease severity defined above and whether ACEIs and ARBs were  
13 analysed together or separately. Additionally, preprint studies that had not yet been  
14 formally peer-reviewed were also removed during sensitivity analyses.

15 We included studies that either reported an OR, relative risk (RR) or the raw data  
16 that allowed the calculation of OR in the meta-analyses. If available, we used an  
17 adjusted OR, otherwise we used an unadjusted OR, either reported in the paper or  
18 manually calculated. If the calculated OR exhibited a different result from the  
19 conclusion reached by the paper, this was not included in the results.

20 If more than one outcome was reported, these were all included if they were in  
21 different categories (i.e. severe disease and mortality). If multiple outcome subsets  
22 were reported within the same categories, the outcome with the highest number of  
23 patients in the exposed group, and therefore greatest weight, was used. The only  
24 deviation from this was within the severity of disease category, where the  
25 diagnostic index would take precedence to reduce any potential selection bias for  
26 increased level of care.

1 We used MetaXL (Version 5.3; EpiGear International Pty Ltd) to run random-effects  
2 meta-analyses and create forest plots and funnel plots. Results were reported with a  
3 95% confidence interval (CI). We used Cochrane's Q and  $I^2$  test to assess for  
4 heterogeneity. An  $I^2 < 30\%$  was considered low heterogeneity,  $\geq 30\%$  but  $< 50\%$  was  
5 considered moderate and  $\geq 50\%$  was considered high heterogeneity (37). Sensitivity  
6 analyses were performed on all models by removing each study to assess their risk  
7 of bias on the pooled effect estimates and heterogeneity. Publication bias was  
8 assessed for any meta-analyses that contained 10 or more studies by visually  
9 inspecting funnel plots for asymmetry.

10

## 1 **Results**

### 2 **Eligible studies identified:**

3 From the first two searches, we identified eight drug groups that were hypothesized  
4 to be deleterious in COVID-19 from 178 peer-reviewed publications comprising  
5 ACEIs, ARBs, corticosteroids, Immunosuppressants, mineralocorticoid receptor  
6 antagonists (MCRAs), NSAIDs, Statins and Thiazolidinediones (TZDs).

7 From the combined total of papers from all three searches, we identified 63 papers  
8 with primary data related to these drugs, with 49 measuring at least one primary  
9 outcome included in the study (Fig 1).

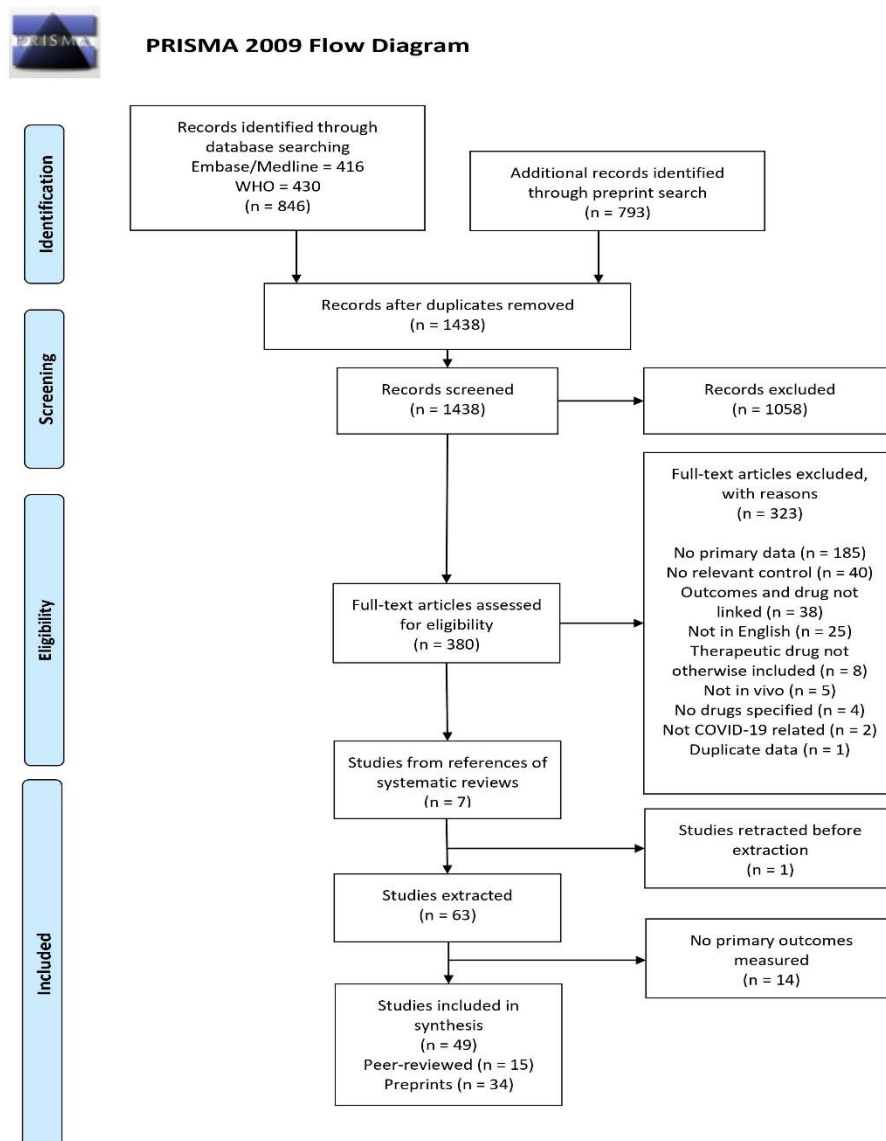

1

2 **Fig 1. PRISMA Flow Chart.** *PRISMA - Preferred Reporting Items for Systematic Reviews*  
 3 *and Meta-Analyses*

4 **Study characteristics:**

5 51% of the papers identified were from China (n=25). The remainder were either  
 6 from Europe (Denmark, France, Italy, Spain and United Kingdom (UK)), North  
 7 America (United States of America (USA)) or other parts of Asia (South Korea)

1 (Table 1). The majority of papers were cohort studies (n=29) and the remainder were  
2 either cross-sectional studies (n=9), case-control studies (n=8), case series (n=2) or a  
3 hybrid design (n=1). There were no experimental or quasi-experimental studies  
4 included in this review. Thirteen studies investigated more than one relevant drug,  
5 with one study (38) presenting data for all eight drug groups.

6 **Table 1. Geographical Demographics of Included Studies and Peer-Review Status**

| Study Country | Number of studies (peer-reviewed) |
|---------------|-----------------------------------|
| China         | 25 (10)                           |
| USA           | 9 (2)                             |
| UK            | 4 (0)                             |
| Italy         | 3 (2)                             |
| Spain         | 3 (1)                             |
| France        | 2 (0)                             |
| South Korea   | 2 (0)                             |
| Denmark       | 1 (0)                             |
| Total         | 49 (15)                           |

7 *USA - United States of America, UK - United Kingdom.*

## 8 **Exposure status and outcome measures:**

9 Most studies analysed outcomes for patients taking drugs regularly prior to  
10 contracting COVID-19. Studies that analysed ACEI, ARB, MCRA, statin and TZD  
11 usage measured outcomes only from those taking the drugs regularly, although one  
12 study compared outcomes of continued use of ACEIs and ARBs after admission  
13 with withdrawal of treatment (39). One study analysed acute treatment with the  
14 immunosuppressant tocilizumab (40), and one analysed acute treatment with the  
15 NSAID celecoxib (41). All the remaining studies, which looked at the use of drugs  
16 for treating COVID-19 focussed on corticosteroids. There was a mix of studies

1 assessing acute treatment doses of corticosteroids and those taking long-term  
2 corticosteroids on severity of disease. All studies analysing susceptibility to  
3 infection with corticosteroids assessed those taking long-term steroids and all  
4 studies analysing mortality assessed those receiving acute doses.

## 5 **Quality assessment:**

6 The majority of the studies were assessed as being of fair quality (45%), followed by  
7 good quality (35%); the remaining studies were assessed to be of high risk of bias  
8 and rated as poor quality (20%). Generally, studies were downgraded due to limited  
9 justifications of sample sizes used and insufficient controlling for potential  
10 confounders.

## 11 **Sensitivity analysis by publication status:**

12 As a considerable portion of the included studies were published as preprints that  
13 had not formally been peer-reviewed, we undertook sensitivity analysis on any of  
14 these studies eligible for meta-analysis to determine their influence on the overall  
15 effect estimates when included in random-effects models. None of the included  
16 preprints were found to significantly influence any of these results, described  
17 below, and they were therefore included in the analyses. Results of the sensitivity  
18 analyses can be viewed in Appendix 7.

## 19 **MCRAs, NSAIDs, Statins and TZDs**

20 For four of the drug groups (MCRAs, NSAIDs, statins and TZDs), meta-analysis  
21 revealed no evidence of protection or harm for any of the groups of outcomes. None  
22 of these drug groups had any studies analysing mortality, and only NSAIDs had  
23 enough studies analysing severity of disease to perform a meta-analysis (Appendix  
24 6 – Fig 14). No pooled effect estimates showed any statistically significant evidence  
25 of harm in patients with COVID-19 (Table 2) (Appendix 6 – Figs 15-17).

26

1 **Table 2. Summary of results for MCRAs, NSAIDs, statins and TZDs**

| Drug    | Studies (n) | Susceptibility (n) | Pooled effect                 | Severity (n) | Pooled effect                 | Mortality (n) | Pooled effect |
|---------|-------------|--------------------|-------------------------------|--------------|-------------------------------|---------------|---------------|
| NSAIDs  | 9           | 5                  | OR 1.04<br>(95% CI 0.91-1.18) | 6            | OR 0.90<br>(95% CI 0.66-1.22) | -             | -             |
| Statins | 5           | 4                  | OR 1.04<br>(95% CI 0.87-1.25) | 2            | -                             | -             | -             |
| TZDs    | 4           | 4                  | OR 1.04<br>(95% CI 0.61-1.79) | 1            | -                             | -             | -             |
| MCRAs   | 2           | 2                  | -                             | -            | -                             | -             | -             |

2 *NSAIDs – non-steroidal anti-inflammatory drugs, TZDs – thiazolidinediones, MCRAs –*  
3 *mineralocorticoid receptor antagonists. Effects of drug groups on susceptibility*

4 Results of studies looking into the effect of drug groups on the susceptibility to  
5 COVID-19 infection are summarised in Appendix 3 - **Table 3**.

6 **RAASB**

7 Ten studies were used in the meta-analysis of susceptibility to COVID-19 with  
8 RAASBs (33, 38, 42-49). Seven stratified their results into those taking ACEIs and  
9 those taking ARBs, and three combined the two drug groups (**Fig 2**).

10 The total pooled effect estimate from all the studies showed no evidence that  
11 RAASBs affect the risk of contracting COVID-19 (OR 0.94; 95% CI 0.82-1.07). Visual  
12 inspection of the funnel plot showed no evidence of publication bias (Appendix 4 -  
13 Fig 12). When split into subgroups for drug group, study design and statistical  
14 adjustment, this result was unchanged (Appendix 6 – Figs 18-20).

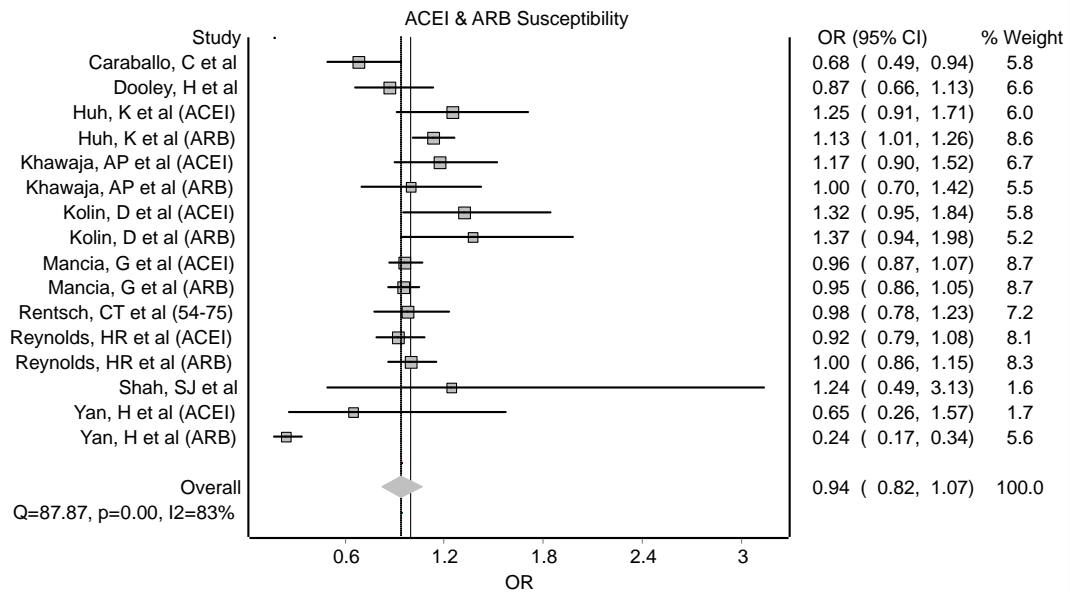

1

2 **Fig 2. Forest plot for susceptibility to COVID-19 for those taking regular RAASBs.**

3 *ACEI – angiotensin-converting enzyme inhibitor, ARB – angiotensin-II-receptor blocker, OR*  
 4 *– odds ratio, CI – confidence interval.*

5 **Corticosteroids**

6 Four studies investigated the effects of corticosteroids on susceptibility to COVID-19  
 7 (38, 44, 48, 49). One study, rated as good quality, measured only those taking  
 8 inhaled corticosteroids (38), therefore meta-analysis was not conducted. This study  
 9 was also the only one to report an increased risk of contracting COVID-19 amongst  
 10 patients taking corticosteroids, with the remaining three studies reporting null  
 11 effects (Appendix 3 – Table 3).

12 **Immunosuppressants**

13 Five studies (32, 38, 44, 46, 48) analysing the effect of immunosuppressants on  
 14 susceptibility to COVID-19 were included in the meta-analysis (Fig 3).

15 The initial analysis showed no statistically significant evidence of harm or benefit  
 16 (OR 1.11; 95% CI 0.86 – 1.43). Sensitivity analysis showed removal of Rentsch, CT et  
 17 al resulted in a statistically significant movement of the pooled effect in the direction  
 18 of harm (OR 1.29; 95% CI 1.19 - 1.40; I<sup>2</sup> 0%), but was 96.9% weighted towards the  
 19 result from Mancia, G et al. When analysed as subgroups based on study design, we



1 found the same result for case-control and cross-sectional studies (OR 1.29; 95% CI  
 2 1.19 – 1.40) (Fig 3).

3 The only study looking at susceptibility that was not included in the meta-analysis  
 4 (50) looked at individual immunosuppressive drugs compared against each other,  
 5 finding janus kinase inhibitor usage was more prevalent among rheumatology  
 6 patients with COVID-19, whereas no evidence of a protective or harmful effect of  
 7 methotrexate was observed.

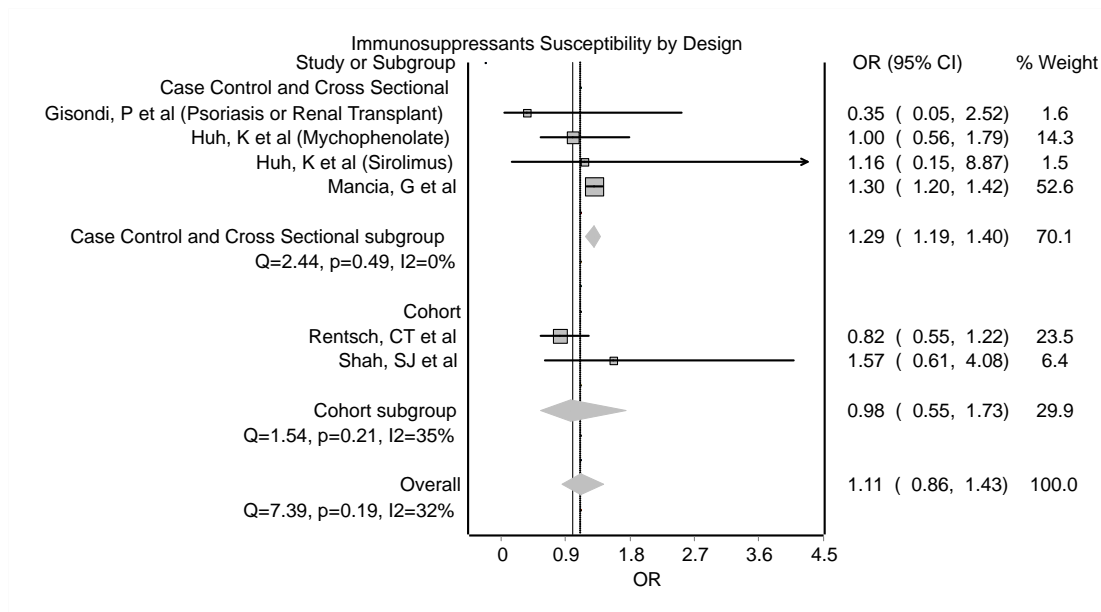

8

9 **Fig 3. Forest plot for effect of immunosuppressants on susceptibility to COVID-19,**  
 10 **stratified by study design. OR – odds ratio, CI – confidence interval.**

## 1 Effects of drug groups on severity

2 Results of studies looking into the effect of drug groups on the severity of COVID-  
3 19 infection are summarised in Appendix 3 – Table 4.

### 4 RAASB

5 Among the total pool of studies, there was no evidence of benefit or harm with  
6 RAASBs (OR 0.93; 95% CI 0.77 – 1.12) (Fig 4). No individual studies affected either  
7 the pooled effect estimate or the heterogeneity. Visual inspection of the funnel plot  
8 showed no evidence of publication bias (Appendix 4 - Fig 13).

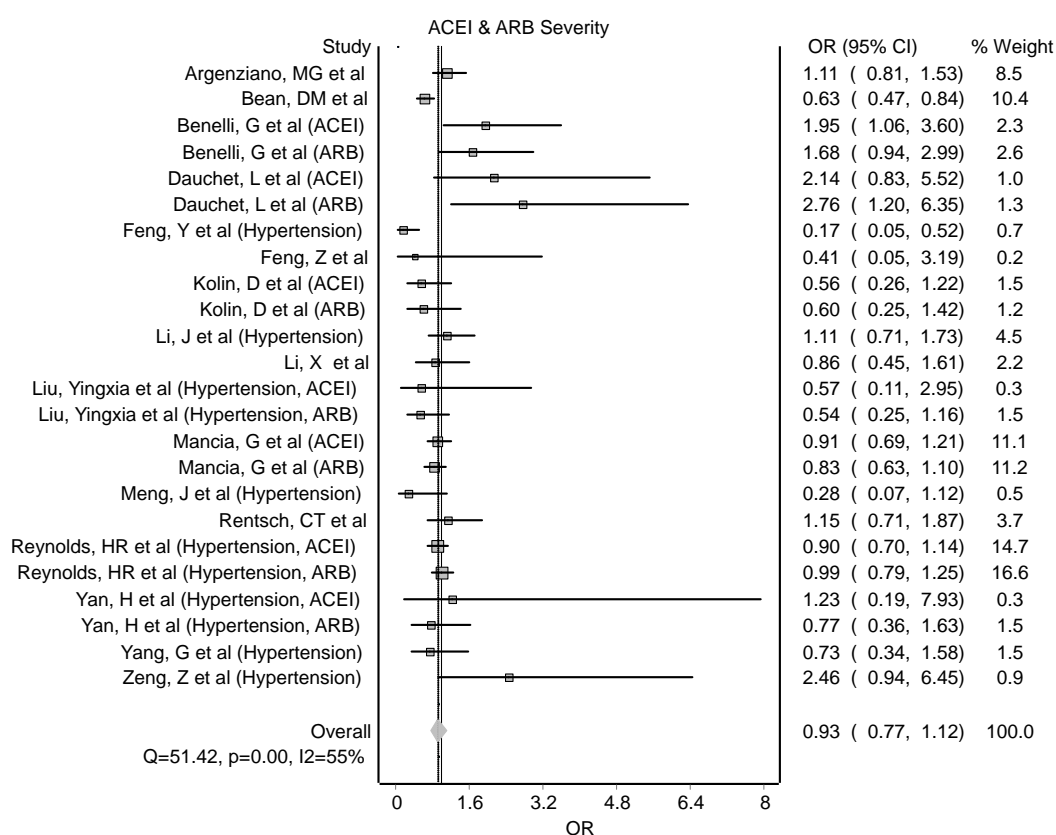

9

10 **Fig 4. Forest plot of effect of RAASBs on severity of COVID-19.** ACEI – angiotensin-  
11 converting enzyme inhibitor, ARB – angiotensin-II-receptor blocker, OR – odds ratio, CI –  
12 confidence interval.

13 Subgroup analyses consisting of three subgroups: either no or insufficient  
14 adjustment and compared against a general population; compared against  
15 hypertensive controls; and what we considered sufficiently adjusted results

1 (adjustment for at least age, sex and one or more co-morbidities) was performed.  
 2 This showed statistically significant evidence of a protective effect from ACEIs and  
 3 ARBs for adjusted results (OR 0.86; 95% CI 0.77 – 0.96) (Fig 5). Sensitivity analysis  
 4 showed that the removal of the result from Bean, DM et al (51) removed the  
 5 statistically significant pooled effect estimate (OR 0.90; 95% CI 0.80 – 1.02).

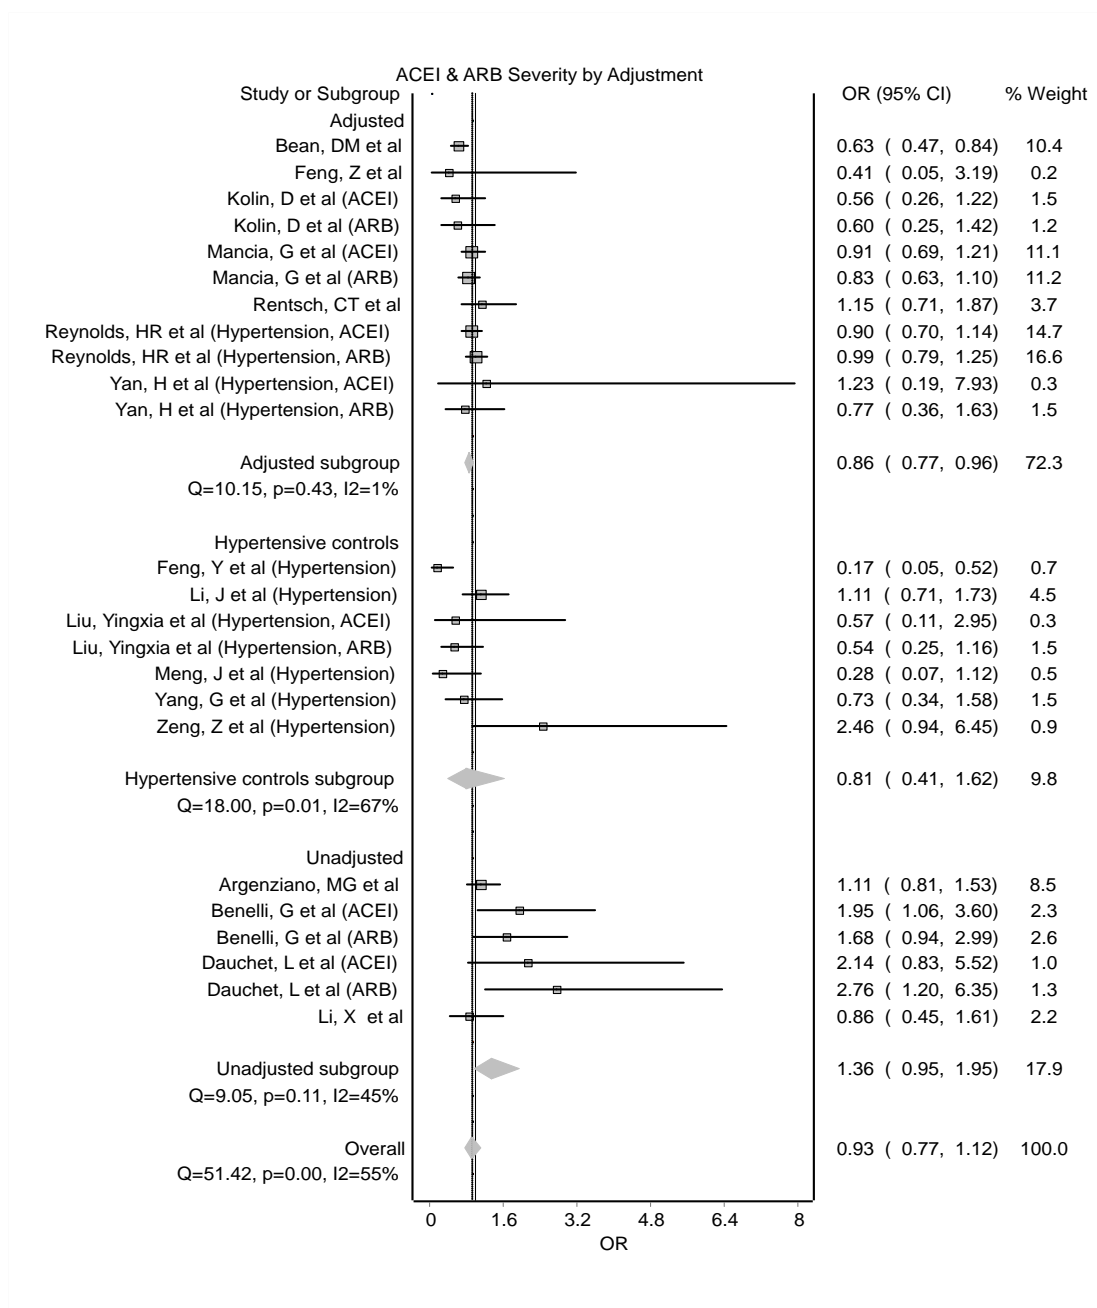

6  
 7 **Fig 5. Forest plot of effect of RAASBs on severity of COVID-19 stratified by**  
 8 **adjustment. ACEI – angiotensin-converting enzyme inhibitor, ARB – angiotensin-II-receptor**  
 9 **blocker, OR – odds ratio, CI – confidence interval.**

1 Creating diagnostic severity index or higher level of care subgroups showed  
 2 statistically non-significant and heterogeneous results (OR 0.84; 95% CI 0.56 – 1.27; I<sup>2</sup>  
 3 45% and OR 0.94; 95% CI 0.77 - 1.15; I<sup>2</sup> 62%, respectively). When these two groups  
 4 were analysed separately and subgroup analysis was run for level of adjustment,  
 5 this showed a statistically non-significant result for adjusted studies using the  
 6 severity index (OR 0.77; 95% CI 0.39 – 1.49). However, further statistically significant  
 7 evidence of benefit for RAASBs among adjusted studies in regard to the highest  
 8 level of care needed was observed (OR 0.85; 95% CI 0.74 – 0.98) (Fig 6). Again,  
 9 removal of the result from Bean, DM et al (51) made the result statistically non-  
 10 significant. This stratification also showed statistically significant evidence of harm  
 11 from unadjusted studies (OR 1.63; 95% CI 1.16 - 2.31).

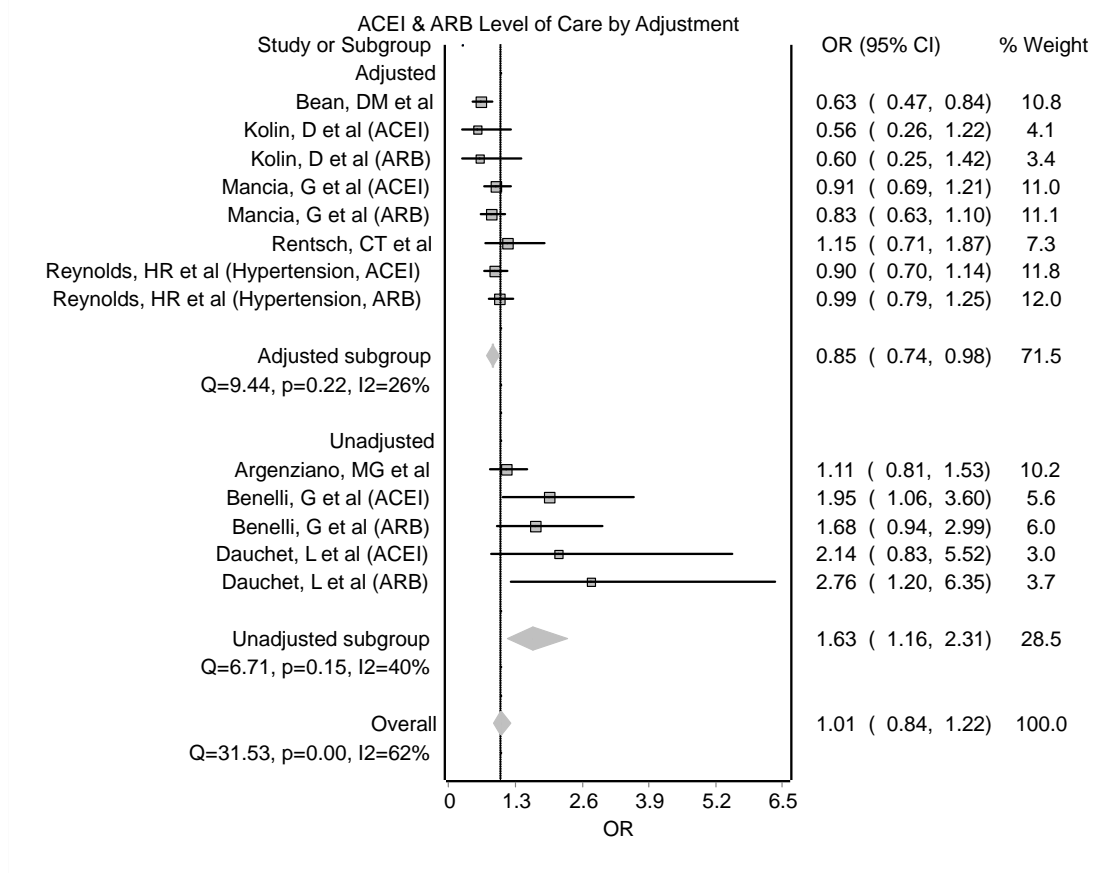

12

13 **Fig 6 Forest plot of effect of RAASBs on the highest level of care needed, stratified by**  
 14 **level of adjustment. ACEI – angiotensin-converting enzyme inhibitor, ARB – angiotensin-II-**  
 15 **receptor blocker, OR – odds ratio, CI – confidence interval.**

## 1 *Corticosteroids*

2 Eight studies with verifiable data assessed the risk of corticosteroids increasing the  
3 risk of developing severe disease (49, 52-58). The majority were cohort studies,  
4 which varied by study quality and other methodological factors (Appendix 3 –  
5 **Table 4**).

6 Four cohort studies measured outcomes from acute treatment doses of  
7 corticosteroids, reaching different conclusions; however, one study did not have a  
8 calculable OR and so a meta-analysis was not possible.

9 The four studies which used long-term steroids as their exposure were analysed  
10 together in a meta-analysis. One study ran different analyses for oral and inhaled  
11 steroids. As these can be co-prescribed, this analysis was run twice with each model  
12 including either the inhaled or oral corticosteroid measurement. Neither model  
13 showed statistically significant evidence of harm or benefit for severity of COVID-19  
14 for those taking long-term steroids (inhaled corticosteroids = OR 1.40; 95% CI 0.81 –  
15 2.39;  $I^2$  36%; oral corticosteroids = OR 1.36; 95% CI 0.76 – 2.45;  $I^2$  44% (**Fig 7**)).

16

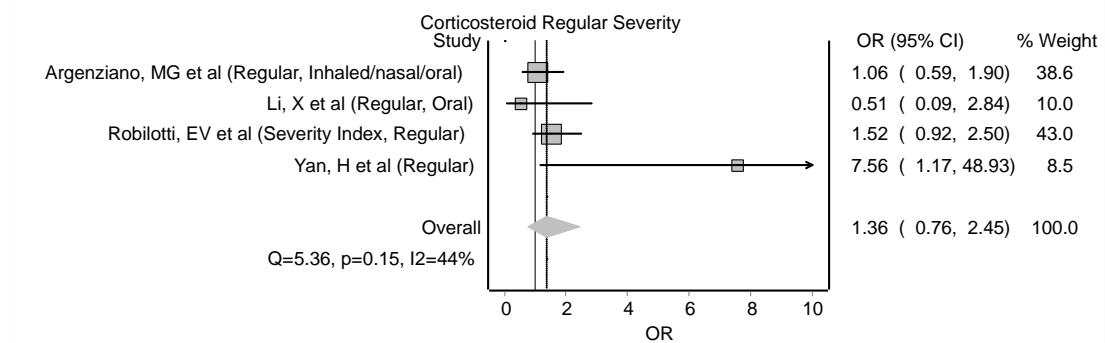

17

18 **Fig 7. Forest plot of effect of regular corticosteroids on severity of COVID-19. OR –**  
19 *odds ratio, CI – confidence interval.*

## 20 *Immunosuppressants*

21 Meta-analysis was conducted on four studies (46, 54, 56, 59) of severity of COVID-19  
22 in those taking immunosuppressants. All four were cohort studies and all scored

1 poorly on aspects of controlling for confounding during quality assessment  
 2 (Appendix 3 – Table 4).

3 The pooled effect estimate showed no statistically significant evidence of benefit or  
 4 harm (OR 0.68; 0.27 – 1.71) (Fig 8).

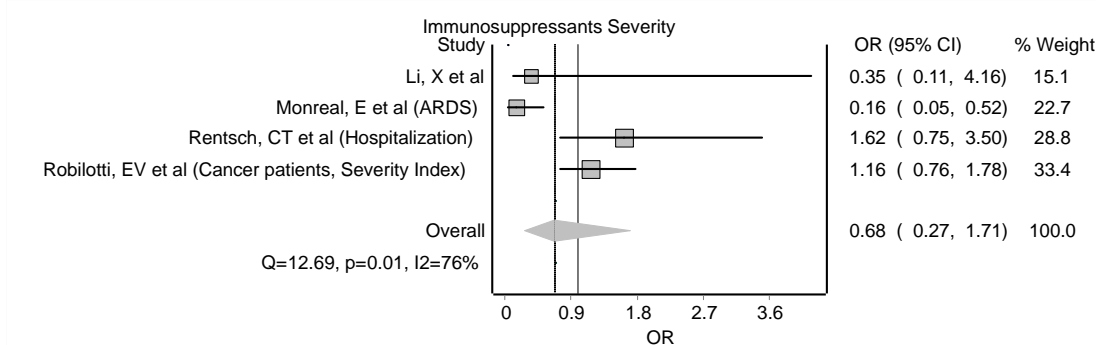

5

6 **Fig 8. Forest plot for effect of immunosuppressants on severity of COVID-19.** OR –  
 7 odds ratio, CI – confidence interval, ARDS – acute respiratory distress syndrome.

8 The studies not included in this meta-analysis reached opposing conclusions, but in  
 9 very different scenarios. The only study to look at acute usage of tocilizumab (40)  
 10 was a case control study, finding evidence of benefit in terms of requiring  
 11 ventilation (OR 0.42; 95% CI 0.2 – 0.89) or ICU care (OR 0.17; 95% CI 0.06-0.48). An  
 12 additional case control study (60) , found that those on immunosuppressants had  
 13 more severe COVID-19 when compared with their family members who tested  
 14 positive for SARS-CoV-2, but no OR was available nor calculable.

## 15 **Effects of drug groups on mortality**

16 Results of studies looking into the effect of drug groups on mortality in COVID-19  
 17 infection are summarised in Appendix 3 – Table 5.

### 18 **RAASB**

19 Eight studies investigated death rates among those taking RAASBs (61-68) with six  
 20 grouping them together and two analysing ACEIs and ARBs separately (Appendix  
 21 3 – Table 5).

22 None of these studies adjusted their results, although three used a hypertensive  
 23 control group. When subgroup analysis was undertaken to reflect these, it showed

- 1 no evidence of harm or benefit against hypertensive controls (OR 0.91; 95% CI 0.62 –
- 2 1.32), the general population (OR 1.11; 95% CI 0.67 – 1.85) or for the pooled effect
- 3 overall (OR 0.97; 95% CI 0.74 – 1.29) (Fig 9).

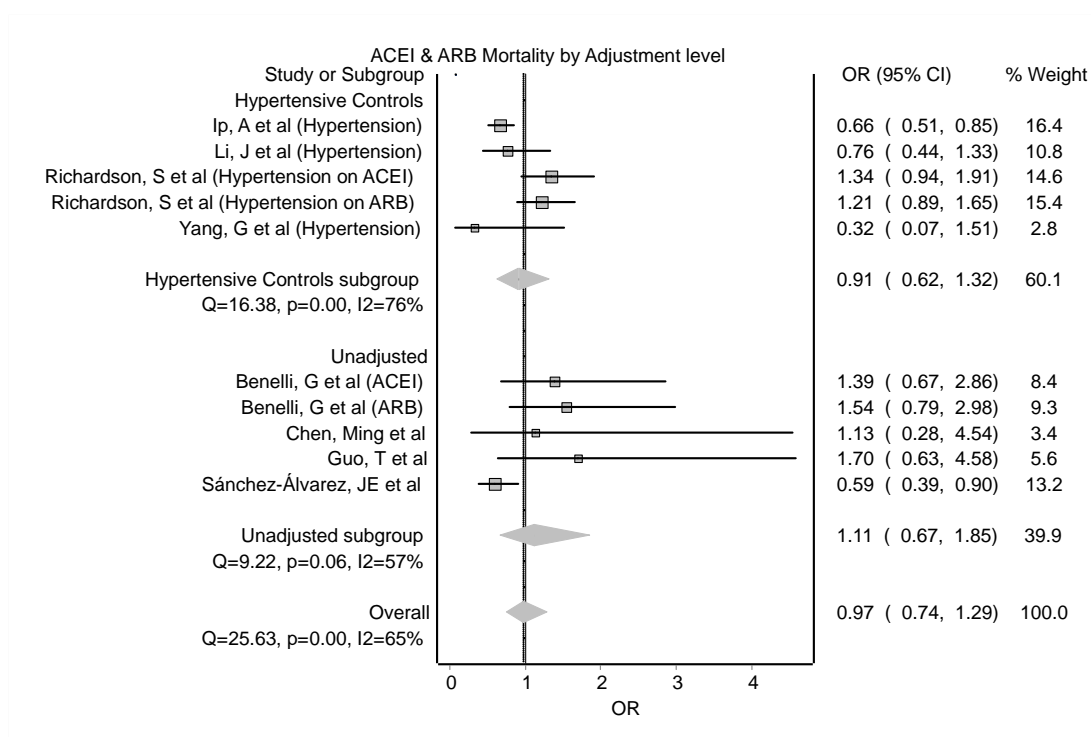

4

5 **Fig 9. Forest plot of effect of RAASBs on mortality, stratified by control group.** ACEI –  
 6 *angiotensin-converting enzyme inhibitor*, ARB – *angiotensin-II-receptor blocker*, OR – *odds*  
 7 *ratio*, CI – *confidence interval*.

- 8 Subgroup analysis of studies which combined RAASBs showed a pooled effect
- 9 estimate exhibiting statistically significant evidence of benefit (OR 0.68; 95% CI 0.55
- 10 – 0.85) with low heterogeneity ( $I^2$  5%) (Fig 10). During sensitivity analysis, the result
- 11 became statistically non-significant if the results from either Ip, A et al or Sánchez-
- 12 Álvarez, JE et al were removed. These two studies were also the only two in this
- 13 analysis that were rated as poor during the quality assessment.

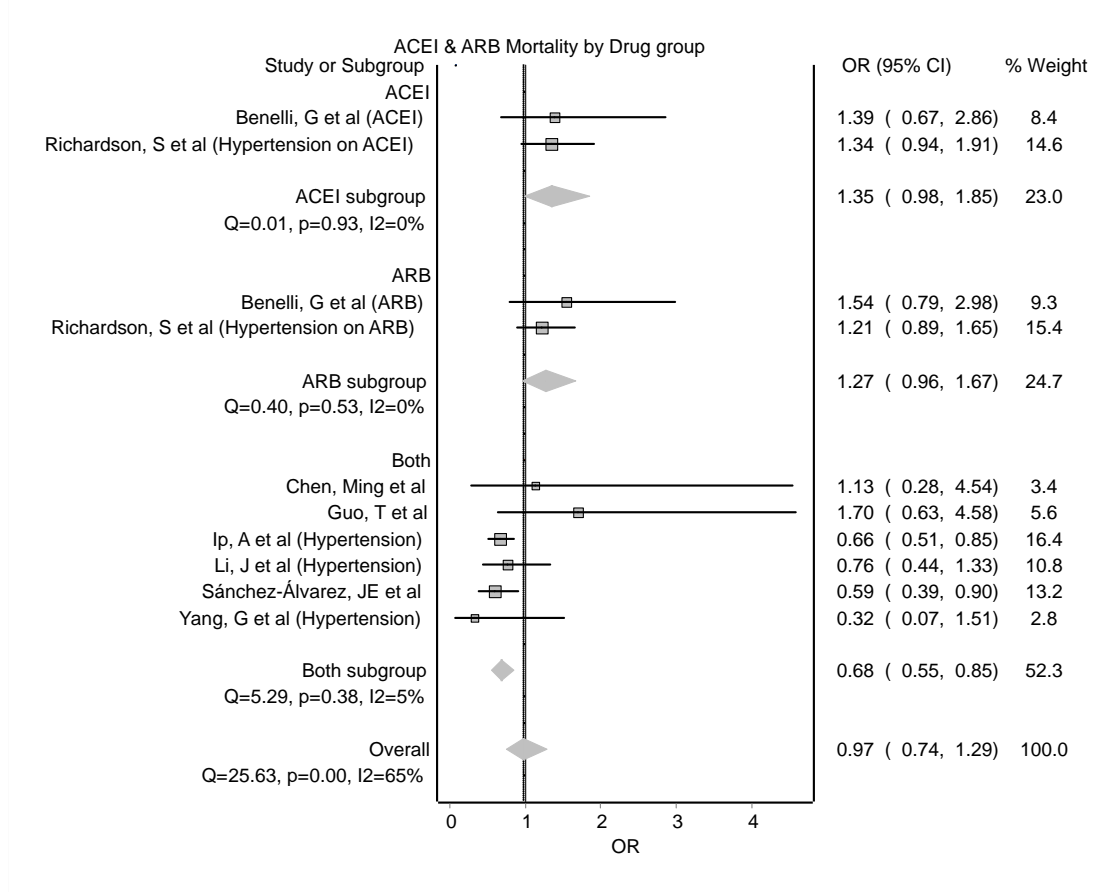

1

2 **Fig 10. Forest plot for effect of RAASBs on mortality in COVID-19, stratified by drug**  
 3 **group.** ACEI – angiotensin-converting enzyme inhibitor, ARB – angiotensin-II-receptor  
 4 *blocker, OR – odds ratio, CI – confidence interval.*

5 Two studies were not included in the meta-analysis, each reporting conflicting  
 6 results with regards to mortality (69, 70) (Appendix 3 – Table 5).

7 **Corticosteroids**

8 Seven (62, 67, 71-75) of the 10 studies assessing mortality in those given  
 9 corticosteroids were included in the meta-analysis. All of these analysed acute doses  
 10 used to treat COVID-19 admissions in hospital (Appendix 3 – Table 5). Two studies  
 11 (55, 76) reported no evidence of harm or benefit but it was not possible to extract  
 12 summary data for pooled analysis. The remaining study (54) compared hazard  
 13 ratios (HRs) for high and low dose corticosteroids, finding a low-dose had no  
 14 evidence of either harm or benefit (HR 1.26; 95% CI 0.61 – 2.58), but a high-dose  
 15 showed evidence of increased mortality (HR 3.5; 95% CI 1.79 – 6.86).



1 Meta-analysis of the remaining studies showed evidence of harm (OR 2.22; 95% 1.26  
2 – 3.90) (Fig 11). The authors of three of the studies highlighted confounding by  
3 indication as a likely factor considerably affecting their results, and when these  
4 studies were removed, the pooled effect estimate showed there was no clear  
5 evidence of an effect (OR 1.48; 95% CI 0.73 – 3.00;  $I^2$  67%).

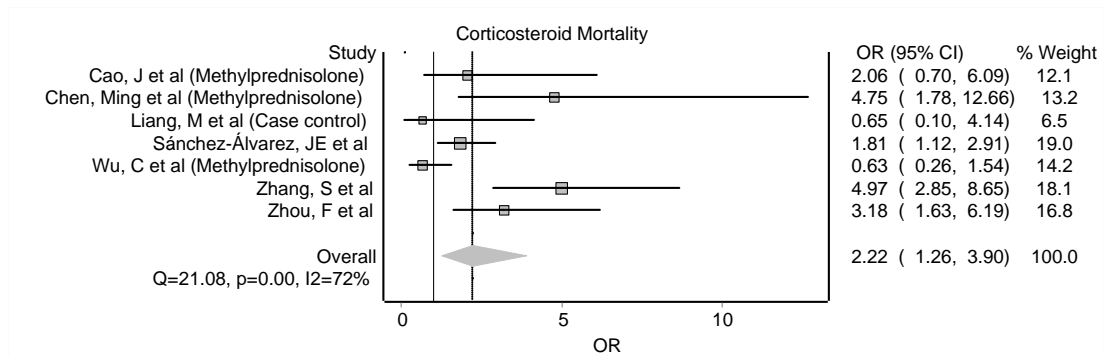

6  
7 **Fig 11. Forest plot of effect of corticosteroids on mortality.** OR – odds ratio, CI –  
8 confidence interval.

### 9 *Immunosuppressants*

10 Two studies analysed mortality rates in those taking immunosuppressants. (40, 59).  
11 Neither found statistically significant evidence of increased or decreased mortality  
12 (OR 0.88; 95% CI 0.17 – 4.46 and OR 0.90; 95% CI 0.24 – 3.42, respectively)  
13 (Appendix 3 – Table 5).

14

15

16

## 1 Discussion

### 2 Statement of principal findings

3 This rapid systematic review and meta-analysis attempted to identify and assess  
4 any potentially deleterious drug groups in covid-19 susceptibility and prognosis. In  
5 terms of susceptibility to infection, we found no pooled effect estimates and one  
6 subgroup analysis with statistically significant evidence of increased susceptibility  
7 (Fig 3), which would be in keeping with many other infections and a known risk of  
8 immunosuppressant use (77). Hence, we found no evidence to suggest that those  
9 without COVID-19 should stop taking their medication to reduce their risk of  
10 contracting the disease. Stopping immunosuppressants may also result in a flare-up  
11 of a person's underlying condition, which can result in increased risk of infection  
12 (78). Furthermore, the withdrawal of any necessary medications could cause harm  
13 from the disease the drug was being used to treat, as well as from a potentially  
14 severe form of COVID-19 for people with hypertension and diabetes who are  
15 already at increased risk (79, 80).

16 We found no evidence that long-term use of any of these drugs increases the  
17 severity of disease, nor the mortality rates. One subgroup analysis of RAASBs  
18 showed a statistically significant relationship between RAASB usage and requiring  
19 a higher level of hospital care (Fig 6). However, this was found in an unadjusted  
20 subgroup where the adjusted subgroup showed evidence of protection, highlighting  
21 the effect of known confounders, such as age and cardiovascular disease (81), on the  
22 results from these observational studies. This evidence of protection against more  
23 severe disease was also shown by the pooled effect of all adjusted studies analysing  
24 severity (Fig 5).

### 25 Strengths and limitations

26 This rapid systematic review and meta-analysis has synthesised the best available  
27 evidence from the first few months of the pandemic for each of these drugs when

1 taken by those with or at risk of COVID-19. This study has, within the limitations  
2 imposed by time and the unparalleled research publication rate, aimed to compile a  
3 comprehensive list of drugs that were hypothesized to be deleterious in peer-  
4 reviewed papers at the time of the searches.

5 This review however has several limitations. The rapidity with which research is  
6 being produced and published affected our study in a number of ways. Firstly, we  
7 acknowledge that while a rapid review is justifiable on the grounds of swifter  
8 completion, it is less robust than a systematic review. Secondly, the studies included  
9 in this review were also completed within a short space of time in order to attempt  
10 to learn from clinical practice as quickly as possible. As a result of this, many papers  
11 that would be relevant to this review, including papers with stronger evidence and  
12 more robust methodology than some of those included may now be available.  
13 Finally, the research landscape is changing so quickly that the studies included in  
14 this review were all published prior to conducting the last search. This will bias our  
15 results towards the studies that were produced more quickly and in countries that  
16 experienced larger COVID-19 case numbers earlier on in this outbreak. These  
17 countries may have large differences in their demographics as well as clinical  
18 protocols for both pre-existing co-morbidities and COVID-19, which could impact  
19 the generalisability of our findings.

20 Another factor heightening the risk of bias, errors and methodological inadequacies,  
21 is the lack of peer-reviewed articles and the use of preprints in this review. We  
22 conducted a sensitivity analysis in January 2021 to analyse whether the removal of  
23 papers that had not made it through the peer-review process at this point affected  
24 the results, but there were no significant changes to the pooled outcomes (Appendix  
25 7). Nevertheless, we must emphasise that because we have included preprints, the  
26 results from this review are only to highlight potential outcomes to evaluate with  
27 further studies and should not be used to alter clinical practice.

1 As all of the evidence in this review is from observational studies, this introduces a  
2 risk of bias from confounding factors, despite many studies attempting to  
3 statistically adjust for these. Any confounders not adjusted for or as yet unknown  
4 will have affected our results. One example of this is the discovery that people with  
5 a Black, Asian or minority ethnic background are at an increased risk of severe  
6 COVID-19 (82), something that was not apparent at the beginning of the outbreak  
7 and was therefore only adjusted for in five of the studies included in the review.  
8 Other biases evident in the studies included confounding by indication, most  
9 evident among the studies looking at acute treatment of COVID-19 with  
10 corticosteroids, and misclassification bias in studies where it was possible the  
11 control group had been buying the drug of interest over-the-counter or had stopped  
12 taking it immediately prior to admission to hospital. This happened with NSAIDS  
13 for example.

14 Using aspects of the GRADE assessment, the quality of evidence presented in this  
15 review could be classified as low, primarily due to inconsistency, indirectness,  
16 imprecision and risk of bias across each outcome (31).

## 17 **Interpretation in light of the wider literature**

18 One of the reasons RAASBs, MCRAs, NSAIDs, Statins and TZDs were hypothesized  
19 to be harmful is their potentially upregulating effect on ACE2, this being the entry  
20 point into cells for SARS-CoV-2. Although there are studies which have shown that  
21 all of these drugs may upregulate ACE2, particularly RAASBs, the evidence is  
22 largely from animal studies, and some of it is contradictory (83). We found no  
23 evidence to suggest any of these drugs worsen outcomes or increase the  
24 susceptibility to contracting COVID-19 and some evidence to suggest RAASBs  
25 could be protective. Whilst it is unclear if this is related to their effect on ACE2, it  
26 appears that the protective nature of ACE2 may in fact provide a target for treating  
27 COVID-19 (84). Studies have also shown similar protective effects of ACEIs (85),  
28 ARBs and statins (86) in non-COVID pneumonias.

1 Another prominent reason for drugs to be hypothesized to worsen outcomes was  
2 immunosuppression. Advice emerged early on advising against using steroids in  
3 COVID-19 (14), but this was at odds with the experiences of front-line clinical  
4 workers in China who were using it in a large number of cases (87). Guidance  
5 surrounding long-term immunosuppressants in those with COVID-19 was also  
6 issued (88), however at the same time it appeared that dampening the immune  
7 response may have a role in treating acute infections (89). With the discovery that  
8 interleukin 6 (IL-6) was elevated in patients with severe COVID-19 (90), IL-6  
9 antagonists such as tocilizumab started to be used therapeutically (91). We only  
10 found one study which analysed the outcomes of those treated with tocilizumab  
11 and this found a reduction of ICU admissions and need for ventilation when  
12 patients were given tocilizumab (40). This was an observational study where the  
13 patients were “highly selected” so, although the results were adjusted for  
14 confounders, there remains a risk of bias.

15 The majority of studies included in this review measured outcomes in patients  
16 taking drugs regularly. We only found one study (39) comparing patients who had  
17 the drug withheld during the acute infection with those that continued to take them.  
18 This study found no effect on disease severity or mortality but found statistically  
19 significant reduction in viral clearance and length of stay in those in whom RAASBs  
20 were withheld during their hospital stay. This area requires more research, as any  
21 conclusions we draw from this review can only be applied to those who take these  
22 medications prior to the onset of COVID-19. In order to guide clinical practice,  
23 studies comparing initiated, continued and withheld medications, ideally  
24 randomised controlled trials (RCTs), are paramount (92).

25 With most drug groups included in this review, dosage and timing was not usually  
26 measured or analysed. One study of corticosteroids compared the effect of the  
27 cumulative dose of steroids and the authors concluded that mortality with high-  
28 dose steroids was higher than with low-dose steroids (54). Another study which  
29 found favourable outcomes for corticosteroids as a treatment for COVID-19

1 hypothesized that the timing was also important, opting for low dose steroids early  
2 on in the disease progression (93). These hypotheses were similarly at risk of  
3 confounding by indication, with those going on to develop ARDS more likely to get  
4 higher dose steroids at a later point in time.

## 5 **Implications for policy, practice and research**

6 This review contains exclusively observational studies, many of which have not  
7 been peer-reviewed, and so we do not recommend any changes to normal  
8 prescribing practice. However, we have found no evidence to suggest medications  
9 should be stopped solely due to contracting COVID-19. This goes along with  
10 guidelines published for many of these drug groups (94-96) and the findings of  
11 other rapid reviews (28, 97).

12 For those taking the drugs highlighted in this review, the binary decision between  
13 stopping and continuing their medications, coupled with the contrasting advice  
14 from experts, the media and governments, helped fuel the false dichotomy that  
15 drug groups were either harmful or not. Due to the large number of factors that can  
16 affect outcomes in COVID-19, the harm or benefit derived from starting, stopping or  
17 continuing drugs will affect individuals differently, with co-morbidities,  
18 demographics, other medications and individual response to the virus playing a  
19 role in the progression of the disease. However, this review raises the prospect that  
20 drug groups that have been hypothesized to be deleterious in COVID-19, may have  
21 the potential to be beneficial in certain circumstances. This is evidenced further by a  
22 number of clinical trials, either planned, in progress or completed, involving drugs  
23 or drug groups identified during this review (98-103).

24 Furthermore, where trials are unfeasible, as in the case where the aim is to examine  
25 the effects of long-term drug use on COVID-19, good quality, large-scale  
26 observational studies will be necessary to form the best possible evidence. RCTs will  
27 understandably be focussed on finding drugs used to treat COVID-19, the results of

1 which are beginning to be published (98). However, trials looking at treatments  
2 with drugs included in this review may help inform their use in other contexts.

### 3 **Conclusions**

4 We have highlighted the gaps in the research, such as the lack of RCTs and  
5 mortality data for NSAIDs, immunosuppressants and long-term steroid use. We  
6 have proposed that there should be some focus in future research on these gaps as  
7 well as the use of ACE2, or drugs which upregulate it, as a potential target for  
8 treating COVID-19.

9 This study found a total of eight drug groups hypothesized to be deleterious in  
10 COVID-19. The available data from the first few months of the current pandemic  
11 suggest that there is little to no evidence these drug groups increase susceptibility,  
12 severity or mortality in COVID-19 and we found some evidence that ACEIs and  
13 ARBs may be protective in preventing a more severe disease.

### 14 **References**

- 15 1. Johns Hopkins University. Coronavirus Resource Centre 2020 [cited 2020 3  
16 April]. Available from: <https://coronavirus.jhu.edu/>.
- 17 2. Centers for Disease Control and Prevention. Human Coronavirus Types 2020  
18 [cited 2020 Jul 11]. Available from: <https://www.cdc.gov/coronavirus/types.html>.
- 19 3. European Centre For Disease Prevention and Control. Coronaviruses 2020  
20 [cited 2020 Jul 11]. Available from: [https://www.ecdc.europa.eu/en/covid-19/latest-](https://www.ecdc.europa.eu/en/covid-19/latest-evidence/coronaviruses)  
21 [evidence/coronaviruses](https://www.ecdc.europa.eu/en/covid-19/latest-evidence/coronaviruses).
- 22 4. Lu R, Zhao X, Li J, Niu P, Yang B, Wu H, et al. Genomic characterisation and  
23 epidemiology of 2019 novel coronavirus: implications for virus origins and receptor  
24 binding. *Lancet*. 2020;395(10224):565-74.
- 25 5. Wu F, Zhao S, Yu B, Chen YM, Wang W, Song ZG, et al. A new coronavirus  
26 associated with human respiratory disease in China. *Nature*. 2020;579(7798):265-9.
- 27 6. Li X, Molina-Molina M, Abdul-Hafez A, Uhal V, Xaubet A, Uhal BD.  
28 Angiotensin converting enzyme-2 is protective but downregulated in human and  
29 experimental lung fibrosis. *Am J Physiol Lung Cell Mol Physiol*. 2008;295(1):L178-  
30 85.
- 31 7. Fang L, Karakiulakis G, Roth M. Are patients with hypertension and diabetes  
32 mellitus at increased risk for COVID-19 infection? *The Lancet Respiratory Medicine*.  
33 2020;8(4):e21.

- 1 8. Wu Z, McGoogan JM. Characteristics of and Important Lessons From the  
2 Coronavirus Disease 2019 (COVID-19) Outbreak in China: Summary of a Report of  
3 72314 Cases From the Chinese Center for Disease Control and Prevention. *JAMA*.  
4 2020;323(13):1239-42.
- 5 9. Murthy S, Gomersall CD, Fowler RA. Care for Critically Ill Patients With  
6 COVID-19. *JAMA*. 2020;323(15):1499-500.
- 7 10. Ye Q, Wang B, Mao J. The pathogenesis and treatment of the 'Cytokine Storm'  
8 in COVID-19. *J Infect*. 2020;80(6):607-13.
- 9 11. Medicines and Healthcare Regulatory Agency. Ibuprofen use and  
10 Coronavirus (COVID-19) 2020 [cited 2020 2 April]. Available from:  
11 <https://www.gov.uk/government/news/ibuprofen-use-and-covid19coronavirus>.
- 12 12. Day M. Covid-19: European drugs agency to review safety of ibuprofen. *BMJ*.  
13 2020;368:m1168.
- 14 13. Reality Check Team, BBC Monitoring. Coronavirus and ibuprofen: Separating  
15 fact from fiction: BBC News,; 2020 [cited 2020 Jul 14]. Available from:  
16 <https://www.bbc.co.uk/news/51929628>.
- 17 14. Russell CD, Millar JE, Baillie JK. Clinical evidence does not support  
18 corticosteroid treatment for 2019-nCoV lung injury. *The Lancet*. 2020;395(10223):473-  
19 5.
- 20 15. Hartmann-Boyce J, Hobbs R. Inhaled Steroids in Asthma during the COVID-  
21 19 Outbreak: CEBM; 2020 [cited 2020 Jul 14]. Available from:  
22 [https://www.cebm.net/covid-19/inhaled-steroids-in-asthma-during-the-covid-19-](https://www.cebm.net/covid-19/inhaled-steroids-in-asthma-during-the-covid-19-outbreak/)  
23 [outbreak/](https://www.cebm.net/covid-19/inhaled-steroids-in-asthma-during-the-covid-19-outbreak/).
- 24 16. Kovarik JM, Burtin P. Immunosuppressants in advanced clinical development  
25 for organ transplantation and selected autoimmune diseases. *Expert Opin Emerg*  
26 *Drugs*. 2003;8(1):47-62.
- 27 17. Manez R, Kusne S, Linden P, Gonzalez-Pinto I, Bonet H, Kramer D, et al.  
28 Temporary withdrawal of immunosuppression for life-threatening infections after  
29 liver transplantation. *Transplantation*. 1994;57(1):149-51.
- 30 18. Conforti C, Giuffrida R, Dianzani C, Di Meo N, Zalaudek I. COVID-19 and  
31 psoriasis: Is it time to limit treatment with immunosuppressants? A call for action.  
32 *Dermatologic Therapy*. 2020.
- 33 19. Ferrario CM, Jessup J, Chappell MC, Averill DB, Brosnihan KB, Tallant EA, et  
34 al. Effect of angiotensin-converting enzyme inhibition and angiotensin II receptor  
35 blockers on cardiac angiotensin-converting enzyme 2. *Circulation*.  
36 2005;111(20):2605-10.
- 37 20. Day M. Covid-19: ibuprofen should not be used for managing symptoms, say  
38 doctors and scientists. *BMJ*. 2020;368:m1086.
- 39 21. Little P. Non-steroidal anti-inflammatory drugs and covid-19. *BMJ*.  
40 2020;368:m1185.
- 41 22. Aronson J, Ferner RE. Angiotensin converting enzyme (ACE) inhibitors and  
42 angiotensin receptor blockers in COVID-19: CEBM; 2020 [cited 2020 Jul 14].  
43 Available from: [https://www.cebm.net/covid-19/angiotensin-converting-enzyme-](https://www.cebm.net/covid-19/angiotensin-converting-enzyme-ace-inhibitors-and-angiotensin-receptor-blockers-in-covid-19/)  
44 [ace-inhibitors-and-angiotensin-receptor-blockers-in-covid-19/](https://www.cebm.net/covid-19/angiotensin-converting-enzyme-ace-inhibitors-and-angiotensin-receptor-blockers-in-covid-19/).



- 1 23. Cure E, Cumhur Cure M. Angiotensin-converting enzyme inhibitors and  
2 angiotensin receptor blockers may be harmful in patients with diabetes during  
3 COVID-19 pandemic. *Diabetes Metab Syndr*. 2020;14(4):349-50.
- 4 24. Sharm MS, S; Kelland, K. Coronavirus and the risks of 'speed science': World  
5 Economic Forum; 2020 [cited 2020 2 April]. Available from:  
6 [https://www.weforum.org/agenda/2020/03/speed-science-coronavirus-covid19-](https://www.weforum.org/agenda/2020/03/speed-science-coronavirus-covid19-research-academic)  
7 [research-academic](https://www.weforum.org/agenda/2020/03/speed-science-coronavirus-covid19-research-academic).
- 8 25. Moher D, Liberati A, Tetzlaff J, Altman DG, Group P. Preferred reporting  
9 items for systematic reviews and meta-analyses: the PRISMA statement. *PLoS Med*.  
10 2009;6(7):e1000097.
- 11 26. Garritty C, Gartlehner G, Kamel C, King V, Nussbaumer-Streit B, Stevens A, et  
12 al. Cochrane Rapid Reviews. Interim Guidance from the Cochrane Rapid Reviews  
13 Methods Group. 2020.
- 14 27. World Health Organization. Global research on coronavirus disease (COVID-  
15 19) 2020 [cited 2020 2 April]. Available from:  
16 [https://www.who.int/emergencies/diseases/novel-coronavirus-2019/global-research-](https://www.who.int/emergencies/diseases/novel-coronavirus-2019/global-research-on-novel-coronavirus-2019-ncov)  
17 [on-novel-coronavirus-2019-ncov](https://www.who.int/emergencies/diseases/novel-coronavirus-2019/global-research-on-novel-coronavirus-2019-ncov).
- 18 28. World Health Organization. COVID-19 and the use of angiotensin-converting  
19 enzyme inhibitors and receptor blockers 2020 [cited 2020 Jul 29]. Available from:  
20 [https://www.who.int/publications/i/item/covid-19-and-the-use-of-angiotensin-](https://www.who.int/publications/i/item/covid-19-and-the-use-of-angiotensin-converting-enzyme-inhibitors-and-receptor-blockers)  
21 [converting-enzyme-inhibitors-and-receptor-blockers](https://www.who.int/publications/i/item/covid-19-and-the-use-of-angiotensin-converting-enzyme-inhibitors-and-receptor-blockers).
- 22 29. Gianola S, Jesus TS, Barger S, Castellini G. Characteristics of academic  
23 publications, preprints, and registered clinical trials on the COVID-19 pandemic.  
24 *PLOS ONE*. 2020;15(10):e0240123.
- 25 30. National Heart Lung and Blood Institute. Study Quality Assessment Tools  
26 2014 [cited 2020 June]. Available from: [https://www.nhlbi.nih.gov/health-](https://www.nhlbi.nih.gov/health-topics/study-quality-assessment-tools)  
27 [topics/study-quality-assessment-tools](https://www.nhlbi.nih.gov/health-topics/study-quality-assessment-tools).
- 28 31. Guyatt GH, Oxman AD, Vist GE, Kunz R, Falck-Ytter Y, Alonso-Coello P, et  
29 al. GRADE: an emerging consensus on rating quality of evidence and strength of  
30 recommendations. *BMJ*. 2008;336(7650):924-6.
- 31 32. Gisondi P, Zaza G, Del Giglio M, Rossi M, Iacono V, Girolomoni G. Risk of  
32 hospitalization and death from COVID-19 infection in patients with chronic plaque  
33 psoriasis receiving a biologic treatment and renal transplant recipients in  
34 maintenance immunosuppressive treatment. *J Am Acad Dermatol*. 2020;83(1):285-7.
- 35 33. Khawaja AP, Warwick AN, Hysi PG, Kastner A, Dick A, Khaw PT, et al.  
36 Associations with covid-19 hospitalisation amongst 406,793 adults: the UK Biobank  
37 prospective cohort study. *medRxiv*. 2020. [preprint]
- 38 34. Yan H, Valdes AM, Vijay A, Wang S, Liang L, Yang S, et al. Role of Drugs  
39 Affecting the Renin-Angiotensin-Aldosterone System on Susceptibility and Severity  
40 of COVID-19: A Large Case-Control Study from Zhejiang Province, China.  
41 *medRxiv*. 2020. [preprint]
- 42 35. National Institute for Health and Care Excellence. Renin-angiotensin system  
43 drugs: dual therapy 2015 [cited 2020 Jul 20]. Available from:  
44 <https://www.nice.org.uk/advice/ktt2/chapter/evidence-context>.

- 1 36. Jackson D, Turner R. Power analysis for random-effects meta-analysis. *Res*
- 2 *Synth Methods*. 2017;8(3):290-302.
- 3 37. Higgins JP, Thomas J, Chandler J, Cumpston M, Li T, Page MJ, et al. Chapter
- 4 10: Analysing data and undertaking meta-analyses. *Cochrane handbook for*
- 5 *systematic reviews of interventions*. Version 6 ed: John Wiley & Sons; 2019.
- 6 38. Mancia G, Rea F, Ludergnani M, Apolone G, Corrao G. Renin-Angiotensin-
- 7 Aldosterone System Blockers and the Risk of Covid-19. *N Engl J Med*.
- 8 2020;382(25):2431-40.
- 9 39. Huang L, Chen Z, Ni L, Chen L, Zhou C, Gao C, et al. Impact of Angiotensin-
- 10 converting Enzyme Inhibitors and Angiotensin Receptor Blockers on Inflammatory
- 11 Responses and Viral Clearance in COVID-19 Patients: A Multicenter Retrospective
- 12 Cohort Study. *Research Square*. 2020. [preprint]
- 13 40. Roumier M, Paule R, Groh M, Vallee A, Ackermann F. Interleukin-6 blockade
- 14 for severe COVID-19. *medRxiv*. 2020. [preprint]
- 15 41. Hong W, Chen Y, You K, Tan S, Wu F, Tao J, et al. Celebrex adjuvant therapy
- 16 on COVID-19: An experimental study. *medRxiv*. 2020. [preprint]
- 17 42. Caraballo C, McCullough M, Fuery M, Chouairi F, Keating C, Ravindra N, et
- 18 al. COVID-19 Infections and Outcomes in a Live Registry of Heart Failure Patients
- 19 Across an Integrated Health Care System. *medRxiv*. 2020. [preprint]
- 20 43. Dooley H, Lee K, Freidin M, Hemani G, Roberts A, Lavigne du Cadet J, et al.
- 21 ACE Inhibitors, ARBs and Other Anti-Hypertensive Drugs and Novel COVID-19:
- 22 An Association Study from the COVID Symptom Tracker App in 2,215,386
- 23 Individuals. *SSRN Electronic Journal*. 2020. [preprint]
- 24 44. Huh K, Ji W, Kang M, Hong J, Bae GH, Lee R, et al. Association of previous
- 25 medications with the risk of COVID-19: a nationwide claims-based study from
- 26 South Korea. *medRxiv*. 2020. [preprint]
- 27 45. Kolin DA, Kulm S, Elemento O. Clinical and Genetic Characteristics of Covid-
- 28 19 Patients from UK Biobank. *medRxiv*. 2020. [preprint]
- 29 46. Rentsch CT, Kidwai-Khan F, Tate JP, Park LS, King JT, Skanderson M, et al.
- 30 Covid-19 Testing, Hospital Admission, and Intensive Care Among 2,026,227 United
- 31 States Veterans Aged 54-75 Years. *medRxiv*. 2020. [preprint]
- 32 47. Reynolds HR, Adhikari S, Pulgarin C, Troxel AB, Iturrate E, Johnson SB, et al.
- 33 Renin-Angiotensin-Aldosterone System Inhibitors and Risk of Covid-19. *N Engl J*
- 34 *Med*. 2020;382(25):2441-8.
- 35 48. Shah SJ, Barish PN, Prasad PA, Kistler AL, Neff N, Kamm J, et al. Clinical
- 36 features, diagnostics, and outcomes of patients presenting with acute respiratory
- 37 illness: a comparison of patients with and without COVID-19. *medRxiv*. 2020.
- 38 [preprint]
- 39 49. Yan H, Valdes AM, Vijay A, Wang S, Liang L, Yang S, et al. Role of Drugs
- 40 Affecting the Renin-Angiotensin-Aldosterone System on Susceptibility and Severity
- 41 of COVID-19: A Large Case-Control Study from Zhejiang Province, China.
- 42 *medRxiv*. 2020. [preprint]
- 43 50. Michelena X, Borrell H, Lopez-Corbeto M, Lopez-Lasanta M, Moreno E,
- 44 Pascual-Pastor M, et al. Incidence of COVID-19 in a cohort of adult and paediatric

- 1 patients with rheumatic diseases treated with targeted biologic and synthetic
- 2 disease-modifying anti-rheumatic drugs. *Semin Arthritis Rheum.* 2020;50(4):564-70.
- 3 51. Bean D, Kraljevic Z, Searle T, Bendayan R, Pickles A, Folarin A, et al. ACE-
- 4 inhibitors and Angiotensin-2 Receptor Blockers are not associated with severe
- 5 SARS- COVID19 infection in a multi-site UK acute Hospital Trust. *medRxiv.* 2020.
- 6 [preprint]
- 7 52. Argenziano MG, Bruce SL, Slater CL, Tiao JR, Baldwin MR, Barr RG, et al.
- 8 Characterization and clinical course of 1000 Patients with COVID-19 in New York:
- 9 retrospective case series. *medRxiv.* 2020. [preprint]
- 10 53. Cao C, Chen M, Li Y, Yu L, Huang W, Qian G, et al. Clinical Features and
- 11 Predictors for Patients with Severe SARS-CoV-2 Pneumonia: A Retrospective
- 12 Multicenter Cohort Study. *SSRN Electronic Journal.* 2020. [preprint]
- 13 54. Li X, Xu S, Yu M, Wang K, Tao Y, Zhou Y, et al. Risk factors for severity and
- 14 mortality in adult COVID-19 inpatients in Wuhan. *J Allergy Clin Immunol.*
- 15 2020;146(1):110-8.
- 16 55. Liu Y, Sun W, Li J, Chen L, Wang Y, Zhang L, et al. Clinical features and
- 17 progression of acute respiratory distress syndrome in coronavirus disease 2019.
- 18 *medRxiv.* 2020. [preprint]
- 19 56. Robilotti EV, Babady NE, Mead PA, Rolling T, Perez-Johnston R, Bernardes M,
- 20 et al. Determinants of Severity in Cancer Patients with COVID-19 Illness. *medRxiv.*
- 21 2020. [preprint]
- 22 57. Wang D, Wang J, Jiang Q, Yang J, Li J, Gao C, et al. No Clear Benefit to the Use
- 23 of Corticosteroid as Treatment in Adult Patients with Coronavirus Disease 2019 : A
- 24 Retrospective Cohort Study. *medRxiv.* 2020. [preprint]
- 25 58. Lui GC-Y, Yip TC-F, Wong VW-S, Chow VC-Y, Ho TH-Y, Li TC-M, et al.
- 26 Adverse Clinical Outcomes in COVID-19 Versus SARS: A Territory-Wide Cohort
- 27 Study in Hong Kong. *SSRN Electronic Journal.* 2020. [preprint]
- 28 59. Monreal E, Maza SSdl, Gullón P, Natera-Villalba E, Chico-García JL, Beltrán-
- 29 Corbellini Á, et al. Immunosuppression is associated with a lower risk of moderate
- 30 to severe acute respiratory distress syndrome in COVID-19. *Research Square.* 2020.
- 31 [preprint]
- 32 60. Zhu L, Gong N, Liu B, Lu X, Chen D, Chen S, et al. Coronavirus Disease 2019
- 33 Pneumonia in Immunosuppressed Renal Transplant Recipients: A Summary of 10
- 34 Confirmed Cases in Wuhan, China. *Eur Urol.* 2020;77(6):748-54.
- 35 61. Benelli G, Buscarini E, Canetta C, La Piana G, Merli G, Scartabellati A, et al.
- 36 SARS-COV-2 comorbidity network and outcome in hospitalized patients in Crema,
- 37 Italy. *medRxiv.* 2020. [preprint]
- 38 62. Chen M, Fan Y, Wu X, Zhang L, Guo T, Deng K, et al. Clinical Characteristics
- 39 And Risk Factors For Fatal Outcome in Patients With 2019-Coronavirus Infected
- 40 Disease (COVID-19) in Wuhan, China. *SSRN Electronic Journal.* 2020. [preprint]
- 41 63. Guo T, Fan Y, Chen M, Wu X, Zhang L, He T, et al. Cardiovascular
- 42 Implications of Fatal Outcomes of Patients With Coronavirus Disease 2019 (COVID-
- 43 19). *JAMA Cardiol.* 2020.

- 1 64. Ip A, Parikh K, Parrillo JE, Mathura S, Hansen E, Sawczuk IS, et al.  
2 Hypertension and Renin-Angiotensin-Aldosterone System Inhibitors in Patients  
3 with Covid-19. medRxiv. 2020. [preprint]
- 4 65. Li J, Wang X, Chen J, Zhang H, Deng A. Association of Renin-Angiotensin  
5 System Inhibitors With Severity or Risk of Death in Patients With Hypertension  
6 Hospitalized for Coronavirus Disease 2019 (COVID-19) Infection in Wuhan, China.  
7 JAMA Cardiol. 2020.
- 8 66. Richardson S, Hirsch JS, Narasimhan M, Crawford JM, McGinn T, Davidson  
9 KW, et al. Presenting Characteristics, Comorbidities, and Outcomes Among 5700  
10 Patients Hospitalized With COVID-19 in the New York City Area. JAMA.  
11 2020;323(20):2052-9.
- 12 67. Sánchez-Álvarez JE, Fontán MP, Martín CJ, Pelicano MB, Reina CJC, Prieto  
13 ÁMS, et al. Status of SARS-CoV-2 infection in patients on renal replacement  
14 therapy. Report of the COVID-19 Registry of the Spanish Society of Nephrology  
15 (SEN). Nefrología (English Edition). 2020;40(3):272-8.
- 16 68. Yang G, Tan Z, Zhou L, Yang M, Peng L, Liu J, et al. Angiotensin II Receptor  
17 Blockers and Angiotensin-Converting Enzyme Inhibitors Usage is Associated with  
18 Improved Inflammatory Status and Clinical Outcomes in COVID-19 Patients With  
19 Hypertension. medRxiv. 2020. [preprint]
- 20 69. Lee H-Y, Ahn J, Kang CK, Won S-H, Park J-H, Kang CH, et al. Association of  
21 Angiotensin II Receptor Blockers and Angiotensin-Converting Enzyme Inhibitors on  
22 COVID-19-Related Outcome. SSRN Electronic Journal. 2020. [preprint]
- 23 70. Zhang P, Zhu L, Cai J, Lei F, Qin J-J, Xie J, et al. Association of Inpatient Use of  
24 Angiotensin Converting Enzyme Inhibitors and Angiotensin II Receptor Blockers  
25 with Mortality Among Patients With Hypertension Hospitalized With COVID-19.  
26 Circ res. 2020.
- 27 71. Cao J, Tu WJ, Cheng W, Yu L, Liu YK, Hu X, et al. Clinical Features and Short-  
28 term Outcomes of 102 Patients with Coronavirus Disease 2019 in Wuhan, China.  
29 Clin Infect Dis. 2020;71(15):748-55.
- 30 72. Liang M, Chen P, He M, Tang J, He X, Zhou Y, et al. Corticosteroid Treatment  
31 in Critically Ill Patients with COVID-19: A Retrospective Cohort Study. Research  
32 Square. 2020. [preprint]
- 33 73. Wu C, Chen X, Cai Y, Xia J, Zhou X, Xu S, et al. Risk Factors Associated With  
34 Acute Respiratory Distress Syndrome and Death in Patients With Coronavirus  
35 Disease 2019 Pneumonia in Wuhan, China. JAMA Intern Med. 2020.
- 36 74. Zhang S, Zhao J, Wu Z, Shang Y, Zheng J, Meng M, et al. Potential Predictors  
37 for Disease Progression and Medication Evaluation of 2019 Novel Coronavirus-  
38 Infected Pneumonia in Wuhan, China. SSRN Electronic Journal. 2020. [preprint]
- 39 75. Zhou F, Yu T, Du R, Fan G, Liu Y, Liu Z, et al. Clinical course and risk factors  
40 for mortality of adult inpatients with COVID-19 in Wuhan, China: a retrospective  
41 cohort study. Lancet. 2020;395(10229):1054-62.
- 42 76. Lu X, Chen T, Wang Y, Wang J, Yan F. Adjuvant corticosteroid therapy for  
43 critically ill patients with COVID-19. Crit Care. 2020;24(1):241.

- 1 77. George MP, Masur H, Norris KA, Palmer SM, Clancy CJ, McDyer JF.  
2 Infections in the immunosuppressed host. *Ann Am Thorac Soc*. 2014;11 Suppl  
3 4(Suppl 4):S211-20.
- 4 78. Ceribelli A, Motta F, De Santis M, Ansari AA, Ridgway WM, Gershwin ME, et  
5 al. Recommendations for coronavirus infection in rheumatic diseases treated with  
6 biologic therapy. *J Autoimmun*. 2020;109:102442.
- 7 79. Zhu L, She ZG, Cheng X, Qin JJ, Zhang XJ, Cai J, et al. Association of Blood  
8 Glucose Control and Outcomes in Patients with COVID-19 and Pre-existing Type 2  
9 Diabetes. *Cell Metab*. 2020;31(6):1068-77 e3.
- 10 80. Gao C, Cai Y, Zhang K, Zhou L, Zhang Y, Zhang X, et al. Association of  
11 hypertension and antihypertensive treatment with COVID-19 mortality: a  
12 retrospective observational study. *Eur Heart J*. 2020;41(22):2058-66.
- 13 81. Guan WJ, Liang WH, Zhao Y, Liang HR, Chen ZS, Li YM, et al. Comorbidity  
14 and its impact on 1590 patients with COVID-19 in China: a nationwide analysis. *Eur*  
15 *Respir J*. 2020;55(5):2000547.
- 16 82. Raisi-Estabragh Z, McCracken C, Bethell MS, Cooper J, Cooper C, Caulfield  
17 MJ, et al. Greater risk of severe COVID-19 in Black, Asian and Minority Ethnic  
18 populations is not explained by cardiometabolic, socioeconomic or behavioural  
19 factors, or by 25(OH)-vitamin D status: study of 1326 cases from the UK Biobank.  
20 *Journal of Public Health*. 2020;42(3):451-60.
- 21 83. Dambha-Miller H, Albasri A, Hodgson S, Wilcox CR, Khan S, Islam N, et al.  
22 Currently prescribed drugs in the UK that could upregulate or downregulate ACE2  
23 in COVID-19 disease: a systematic review. *BMJ Open*. 2020;10(9):e040644.
- 24 84. Lumpuy-Castillo J, Lorenzo-Almorós A, Pello-Lázaro AM, Sánchez-Ferrer C,  
25 Egado J, Tuñón J, et al. Cardiovascular Damage in COVID-19: Therapeutic  
26 Approaches Targeting the Renin-Angiotensin-Aldosterone System. *Int J Mol Sci*.  
27 2020;21(18).
- 28 85. Chu C, Zeng S, Hasan AA, Hoher C-F, Krämer BK, Hoher B. Comparison of  
29 infection risks and clinical outcomes in patients with and without SARS-CoV-2 lung  
30 infection under renin-angiotensin-aldosterone system blockade: Systematic review  
31 and meta-analysis. *British Journal of Clinical Pharmacology*.n/a(n/a).
- 32 86. Mortensen E, Anzueto A. Prior use of both a statin and ARB is associated with  
33 lower mortality for patients hospitalized with pneumonia. *European Respiratory*  
34 *Journal*. 2016;48(suppl 60):OA3329.
- 35 87. Wang D, Hu B, Hu C, Zhu F, Liu X, Zhang J, et al. Clinical Characteristics of  
36 138 Hospitalized Patients With 2019 Novel Coronavirus-Infected Pneumonia in  
37 Wuhan, China. *JAMA*. 2020;323(11):1061-9.
- 38 88. Wang C, Rademaker M, Baker C, Foley P. COVID-19 and the use of  
39 immunomodulatory and biologic agents for severe cutaneous disease: An  
40 Australia/New Zealand consensus statement. *The Australasian journal of*  
41 *dermatology*. 2020;07.
- 42 89. Mehta P, McAuley DF, Brown M, Sanchez E, Tattersall RS, Manson JJ, et al.  
43 COVID-19: consider cytokine storm syndromes and immunosuppression. *Lancet*.  
44 2020;395(10229):1033-4.

- 1 90. Chen L, Liu HG, Liu W, Liu J, Liu K, Shang J, et al. [Analysis of clinical  
2 features of 29 patients with 2019 novel coronavirus pneumonia]. Zhonghua Jie He  
3 He Hu Xi Za Zhi. 2020;43(0):E005.
- 4 91. Michot JM, Albiges L, Chaput N, Saada V, Pommeret F, Griscelli F, et al.  
5 Tocilizumab, an anti-IL-6 receptor antibody, to treat COVID-19-related respiratory  
6 failure: a case report. Ann Oncol. 2020;31(7):961-4.
- 7 92. Gnanenthiran SR, Borghi C, Burger D, Charchar F, Poulter NR, Schlaich MP, et  
8 al. Prospective meta-analysis protocol on randomised trials of renin-angiotensin  
9 system inhibitors in patients with COVID-19: an initiative of the International  
10 Society of Hypertension. BMJ Open. 2021;11(2):e043625.
- 11 93. Wang Y, Jiang W, He Q, Wang C, Wang B, Zhou P, et al. Early, low-dose and  
12 short-term application of corticosteroid treatment in patients with severe COVID-19  
13 pneumonia: single-center experience from Wuhan, China. medRxiv. 2020. [preprint]
- 14 94. Bozkurt B, Kovacs R, Harrington B. Joint HFSA/ACC/AHA Statement  
15 Addresses Concerns Re: Using RAAS Antagonists in COVID-19. J Card Fail.  
16 2020;26(5):370.
- 17 95. British Society for Rheumatology. COVID-19 guidance 2020 [cited 2020 Jul 29].  
18 Available from: [https://www.rheumatology.org.uk/practice-quality/covid-19-](https://www.rheumatology.org.uk/practice-quality/covid-19-guidance)  
19 [guidance](https://www.rheumatology.org.uk/practice-quality/covid-19-guidance).
- 20 96. Guys & St Thomas' NHS Foundation Trust. Dermatology and coronavirus:  
21 frequently asked questions 2020 [cited 2020 Jul 29]. Available from:  
22 [https://www.guysandstthomas.nhs.uk/our-services/dermatology/dermatology-and-](https://www.guysandstthomas.nhs.uk/our-services/dermatology/dermatology-and-coronavirus-frequently-asked-questions.aspx#na)  
23 [coronavirus-frequently-asked-questions.aspx#na](https://www.guysandstthomas.nhs.uk/our-services/dermatology/dermatology-and-coronavirus-frequently-asked-questions.aspx#na).
- 24 97. National Institute for Health and Care Excellence. COVID-19 rapid evidence  
25 summary: Long-term use of non-steroidal anti-inflammatory drugs (NSAIDs) for  
26 people with or at risk of COVID-19 2020 [cited 2020 Jul 29]. Available from:  
27 <https://www.nice.org.uk/advice/es25/chapter/Key-messages>.
- 28 98. Horby P, Lim WS, Emberson J, Mafham M, Bell J, Linsell L, et al. Effect of  
29 Dexamethasone in Hospitalized Patients with COVID-19: Preliminary Report.  
30 medRxiv. 2020:2020.06.22.20137273. [preprint]
- 31 99. CTU Bern. CORON-ACT started enrollment 2020 [cited 2020 Jul 28]. Available  
32 from:  
33 [https://www.ctu.unibe.ch/about\\_us/news/coron\\_act\\_started\\_enrollment/index\\_eng.](https://www.ctu.unibe.ch/about_us/news/coron_act_started_enrollment/index_eng.html)  
34 [html](https://www.ctu.unibe.ch/about_us/news/coron_act_started_enrollment/index_eng.html).
- 35 100. Beale R, Carter B, Douthwaite S, Williams S, Mehta M, Lynch E, et al. Lipid  
36 Ibuprofen versus standard of care for acute hypoxaemic respiratory failure due to  
37 COVID-19: a multicentre, randomised, controlled trial (The Liberate Trial) BT  
38 Health2020 [cited 2020 Jul 28]. Available from: <https://btd-health.com/>.
- 39 101. Chen L. Atorvastatin as Adjunctive Therapy in COVID-19 (STATCO19) NIH  
40 U.S. National Library of Medicine2020 [cited 2020 Jul 28]. Available from:  
41 <https://clinicaltrials.gov/ct2/show/NCT04380402>.
- 42 102. Jardine M, Wilcox A. Controlled evaluation of Angiotensin Receptor Blockers  
43 for COVID-19 respiratory Disease (CLARITY): NIH U.S. National Library of  
44 Medicine; 2020 [cited 2020 Jul 28]. Available from:  
45 <https://clinicaltrials.gov/ct2/show/NCT04394117>.

- 1 103. United in Research. The PACE Study: United Health Group; 2020 [cited 2020
- 2 Jul 28]. Available from: <https://www.unitedinresearch.com/studies/2>.

3

4

# 1 **Appendix 1: search terms**

## 2 **First search (Ovid)**

- 3 1. Coronavirus Infections/ or covid-19.mp. or Betacoronavirus/
- 4 2. Pneumonia, Viral/ or Severe Acute Respiratory Syndrome/ or sars-cov-2.mp.
- 5 or SARS Virus/
- 6 3. Pandemics/ or ncov-2019.mp.
- 7 4. 2019-nCov.mp. or Spike Glycoprotein, Coronavirus/
- 8 5. 1 or 2 or 3 or 4
- 9 6. Analgesics/ or Anti-Inflammatory Agents, Non-Steroidal/ or non-
- 10 steroidal.mp or Cyclooxygenase 2 Inhibitors/
- 11 7. Ibuprofen.mp. or ibuprofen/
- 12 8. Angiotensin-Converting Enzyme Inhibitor?.mp. or Angiotensin-Converting
- 13 Enzyme Inhibitors/
- 14 9. ACE Inhibitor?.mp.
- 15 10. Antihypertensive Agents/ or Angiotensin Receptor Antagonists/ or
- 16 ARB?.mp. or Angiotensin II Type 1 Receptor Blockers/
- 17 11. Angiotensin Receptor Blocker?.mp.
- 18 12. Angiotensin II Receptor Blocker?.mp.
- 19 13. Steroid?.mp. or Steroids/
- 20 14. Corticosteroid?.mp. or Adrenal Cortex Hormones/
- 21 15. Immunosuppressant?.mp. or Immunosuppressive Agents/
- 22 16. ((drug? or medication? or prescri\*) adj10 (harm or safe\* or risk or worse\* or
- 23 sever\* or discontinue? or unsafe or avoid)).mp. [mp=ti, ab, ot, nm, hw, fx, kf,
- 24 ox, px, rx, ui, an, sy, tn, dm, mf, dv, kw, dq]
- 25 17. 6 or 7 or 8 or 9 or 10 or 11 or 12 or 13 or 14 or 15 or 16
- 26 18. 5 and 17
- 27 19. Limit 18 to yr="2019-Current"

28



- 1 **Second search (WHO COVID-19 database)**
- 2 1. NSAID\*
- 3 2. Non-steroid\*
- 4 3. Analgesi\*
- 5 4. Ibuprofen
- 6 5. ACE Inhibitor\*
- 7 6. ACE-I\*
- 8 7. ACEI\*
- 9 8. Angiotensin Converting Enzyme Inhibitor\*
- 10 9. Renin-Angiotensin-Aldosterone System Inhibitor\*
- 11 10. Renin-Angiotensin-Aldosterone System Blocker\*
- 12 11. RAAS Inhibitor\*
- 13 12. RAAS Blocker\*
- 14 13. \*pril
- 15 14. Antihypertensive\*
- 16 15. Angiotensin Receptor Blocker\*
- 17 16. ARB\*
- 18 17. \*sartan
- 19 18. \*steroid\*
- 20 19. \*cortico\*
- 21 20. Immunosuppressant\*
- 22 21. Immunosuppressive\*
- 23 22. Immunomodulat\*
- 24 23. Immune modulat\*
- 25 24. Antimineralocorticoid\*
- 26 25. Aldosterone antagonist\*
- 27 26. Spironolactone
- 28 27. MCRA\*
- 29 28. MRA\*
- 30 29. Mineralocorticoid Receptor Antagonist\*

- 1 30. \*statin\*
- 2 31. HMG CoA Reductase Inhibitor\*
- 3 32. Thiazolidinedione\*
- 4 33. \*glitazone\*

### 5 **Third search (NIH iSearch COVID-19 portfolio)**

- 6 1. NSAID
- 7 2. Non-steroid
- 8 3. Analgesi\*
- 9 4. Ibuprofen
- 10 5. ACE Inhibitor
- 11 6. ACE-I
- 12 7. ACEI
- 13 8. Angiotensin Converting Enzyme Inhibitor
- 14 9. "Renin-Angiotensin-Aldosterone System Inhibitor"
- 15 10. "Renin-Angiotensin-Aldosterone System Blocker"
- 16 11. "RAAS Inhibitor"
- 17 12. "RAAS Blocker"
- 18 13. \*pril
- 19 14. Antihypertensive
- 20 15. Angiotensin Receptor Blocker
- 21 16. ARB
- 22 17. \*sartan
- 23 18. \*steroid\*
- 24 19. \*cortico\*
- 25 20. Immunosuppressant
- 26 21. Immunosuppressive
- 27 22. Immunomodulat\*
- 28 23. "Immune modulator"
- 29 24. Antimineralocorticoid

- 1 25. "Aldosterone antagonist"
- 2 26. Spironolactone
- 3 27. MCRA
- 4 28. MRA
- 5 29. "Mineralocorticoid Receptor Antagonist"
- 6 30. \*statin
- 7 31. "HMG CoA Reductase Inhibitor"
- 8 32. Thiazolidinedione
- 9 33. \*glitazone
- 10

## 1 **Appendix 2: inclusion & exclusion criteria**

### 2 **First set**

3 Inclusion criteria:

- 4 1. Papers looking at whether a medication or medications are potentially  
5 unsafe if prescribed for patients with confirmed or suspected COVID-19 or  
6 SARS-Cov-2 infection
- 7 2. Papers looking at whether a medication or medications should be  
8 discontinued in patients who have confirmed or suspected COVID-19 or  
9 SARS-Cov-2 infection and would otherwise take them regularly
- 10 3. Papers looking at the overall safety or benefits of prescribing or  
11 discontinuing a medication or medications that have been identified as  
12 potentially unsafe for patients under criteria 1 or 2
- 13 4. Paper addressing or responding to any paper already included in reference  
14 to the safety of a medication or medications

15

16 Exclusion criteria:

- 17 1. Paper does not mention any specific medications or groups of medications
- 18 2. Paper not related to current COVID-19 outbreak
- 19 3. Published before November 2019
- 20 4. Paper not written in English
- 21 5. Only looking at unlicensed uses of medications, where no medication  
22 involved has already been identified as posing a potential risk when  
23 prescribed for its licensed use(s)
- 24 6. Only looking at medications being used for the treatment of COVID-19,  
25 where no medication involved has already been identified as posing a  
26 potential risk when prescribed for its licensed use(s)

- 1           7. No new data, hypothesis, guidance or recommendations stated related to
- 2           COVID-19 for any individual relevant medications

### 3       **Second set**

#### 4       Inclusion criteria:

- 5           1. Studies looking at the outcomes of patients with COVID-19 or SARS-Cov-2
- 6           infection who were, or would normally be, taking medications that have
- 7           been identified in the preliminary search as potentially harmful if prescribed
- 8           for patients with confirmed or suspected COVID-19 or SARS-Cov-2 infection
- 9           (see list)
- 10          2. Studies looking at the outcomes of patients with COVID-19 or SARS-Cov-2
- 11          infection when given medications that have been identified in the
- 12          preliminary search as potentially harmful if prescribed for patients with
- 13          confirmed or suspected COVID-19 or SARS-Cov-2 infection

#### 14       Exclusion criteria:

- 15          1. Paper does not mention any medications or groups of medications already
- 16          identified as potentially harmful
- 17          2. Paper not related to current COVID-19 outbreak
- 18          3. Published before November 2019
- 19          4. Paper not written in English
- 20          5. Paper has no primary data
- 21          6. Study not performed in vivo
- 22          7. It is unclear from the paper if the clinical outcomes follow the administration
- 23          of a medication or group of medications already identified as potentially
- 24          harmful
- 25          8. There is no measure against non-COVID-19 or non-drug exposed control

## Appendix 3: study tables

Table 3. Summary of studies looking into the effect of drug groups on the susceptibility to COVID-19 infection.

| First Author | Design | Country     | Drug Group | Setting   | Population                     | Sample Size | Specific drugs | Outcome definitions                                                 | Result                    | Statistic                     | 95% CI                            | Quality | Confounders adjusted/matched for                                    | Peer-review or Preprint | Drugs in meta-analyses |
|--------------|--------|-------------|------------|-----------|--------------------------------|-------------|----------------|---------------------------------------------------------------------|---------------------------|-------------------------------|-----------------------------------|---------|---------------------------------------------------------------------|-------------------------|------------------------|
| Caraballo, C | XSS    | USA         | RAASB      | Community | Heart failure registry         | 26703       | Combined       | Symptomatic patients receiving positive test result                 | Protective                | OR 0.68                       | 0.49-0.94                         | Poor    | None                                                                | PP                      | Yes                    |
| Dooley, H    | XSS    | UK          | RAASB      | Community | Self-reporting COVID app users | 2215386     | Combined       | Self-reported positive PCR test                                     | NSE                       | OR 0.87                       | 0.66-1.13                         | Good    | None                                                                | PP                      | Yes                    |
| Huh, K       | CCS    | South Korea | RAASB      | All       | Patients tested for COVID      | 65149       | ACEI & ARB     | Positive test for SARS-CoV-2 NOS                                    | ACEI: NSE<br>ARB: Harmful | ACEI: OR 1.25<br>ARB: OR 1.13 | ACEI: 0.91-1.71<br>ARB: 1.01-1.26 | Good    | Age, sex, comorbidities, location, healthcare usage and other drugs | PP                      | Yes                    |
| Khawaja, AP  | CoS    | UK          | RAASB      | All       | UK Biobank                     | 406793      | ACEI & ARB     | Hospitalization with positive test compared with general population | NSE                       | ACEI: OR 1.17<br>ARB: OR 1.00 | ACEI: 0.90-1.52<br>ARB: 0.70-1.42 | Fair    | Age, sex, ethnicity and hypertension status                         | PP                      | Yes                    |
| Kolin, D     | CoS    | UK          | RAASB      | All       | UK Biobank                     | 502536      | ACEI & ARB     | Positive test compared with general population                      | NSE                       | ACEI: RR 1.32<br>ARB: RR 1.37 | ACEI: 0.95-1.84<br>ARB: 0.94-1.98 | Fair    | Age, sex, BMI, systolic BP, race and deprivation                    | PP                      | Yes                    |

| First Author | Design | Country | Drug Group | Setting  | Population                                 | Sample Size | Specific drugs | Outcome definitions                       | Result | Statistic                     | 95% CI                            | Quality | Confounders/adjusted/matched for                                               | Peer-review or Preprint | Drugs in meta-analyses |
|--------------|--------|---------|------------|----------|--------------------------------------------|-------------|----------------|-------------------------------------------|--------|-------------------------------|-----------------------------------|---------|--------------------------------------------------------------------------------|-------------------------|------------------------|
| Mancia, G    | CCS    | Italy   | RAASB      | All      | Patients with confirmed or suspected COVID | 6272        | ACEI & ARB     | Diagnosed as per interim WHO guidelines   | NSE    | ACEI: OR 0.96<br>ARB: OR 0.95 | ACEI: 0.87-1.07<br>ARB: 0.86-1.05 | Good    | Age, sex, location and co-morbidities                                          | PR                      | Yes                    |
| Rentsch, CT  | CoS    | USA     | RAASB      | Hospital | VA Birth Cohort registry (54-75 years old) | 3789        | Combined       | Positive test for SARS-CoV-2 NOS          | NSE    | OR: 0.98                      | 0.78-1.23                         | Good    | Age, sex, race, co-morbidities, vital signs, medications and health behaviours | PP                      | Yes                    |
| Reynolds, HR | CoS    | USA     | RAASB      | All      | Patients tested for COVID                  | 12594       | ACEI & ARB     | At least one positive test                | NSE    | ACEI: OR 0.92<br>ARB: OR 1.00 | ACEI: 0.79-1.08<br>ARB: 0.86-1.15 | Good    | Age, sex, race, BMI, smoking history, co-morbidities and treatment             | PR                      | Yes                    |
| Shah, SJ     | CoS    | USA     | RAASB      | Hospital | Respiratory admissions tested for COVID    | 316         | Combined       | Positive test compared with negative test | NSE    | OR: 1.24                      | 0.49-3.13                         | Fair    | None                                                                           | PP                      | Yes                    |

| First Author | Design | Country     | Drug Group | Setting  | Population                                 | Sample Size | Specific drugs   | Outcome definitions                                                                                                                                                                                                                                                                         | Result                       | Statistic                     | 95% CI                            | Quality | Confounders/adjusted/matched for                                     | Peer-review or Preprint | Drugs in meta-analyses |
|--------------|--------|-------------|------------|----------|--------------------------------------------|-------------|------------------|---------------------------------------------------------------------------------------------------------------------------------------------------------------------------------------------------------------------------------------------------------------------------------------------|------------------------------|-------------------------------|-----------------------------------|---------|----------------------------------------------------------------------|-------------------------|------------------------|
| Yan, H       | CCS    | China       | RAASB      | Hospital | Admissions with COVID                      | 610         | ACEI & ARB       | Hospitalized compared with general population; Severe or critical compared with non-severe. Severe defined as one of: RR $\geq$ 30/min, SpO <sub>2</sub> $\leq$ 93%, FiO <sub>2</sub> $\leq$ 300mmHg, critical defined as one of: requiring MV, shock, requiring ICU care for organ support | ACEI: NSE<br>ARB: Protective | ACEI: OR 0.65<br>ARB: OR 0.24 | ACEI: 0.26-1.57<br>ARB: 0.17-0.34 | Fair    | Age, sex and BMI                                                     | PP                      | Yes                    |
| Huh, K       | CCS    | South Korea | CS         | All      | Patients tested for COVID                  | 65149       |                  | Positive test for SARS-CoV-2 NOS                                                                                                                                                                                                                                                            | Protective                   | OR 0.86                       | 0.79-0.94                         | Good    | Age, sex, co-morbidities, location, healthcare usage and other drugs | PP                      | Yes                    |
| Mancia, G    | CCS    | Italy       | CS         | All      | Patients with confirmed or suspected COVID | 6272        | Inhaled steroids | Diagnosed as per interim WHO guidelines                                                                                                                                                                                                                                                     | Harmful                      | OR 1.52                       | 1.37-1.68                         | Good    | Age, sex, location and co-morbidities                                | PR                      | Yes                    |
| Shah, SJ     | CoS    | USA         | CS         | Hospital | Respiratory admissions tested for COVID    | 316         |                  | Positive test compared with negative test                                                                                                                                                                                                                                                   | NSE                          | OR 1.77                       | 0.63-4.91                         | Fair    | None                                                                 | PP                      | Yes                    |



| First Author | Design | Country     | Drug Group | Setting  | Population                                                                 | Sample Size | Specific drugs              | Outcome definitions                                                                                                                                                                                                                                                                         | Result  | Statistic                      | 95% CI                             | Quality | Confounders/adjusted/matched for                                     | Peer-review or Preprint | Drugs in meta-analyses |
|--------------|--------|-------------|------------|----------|----------------------------------------------------------------------------|-------------|-----------------------------|---------------------------------------------------------------------------------------------------------------------------------------------------------------------------------------------------------------------------------------------------------------------------------------------|---------|--------------------------------|------------------------------------|---------|----------------------------------------------------------------------|-------------------------|------------------------|
| Yan, H       | CCS    | China       | CS         | Hospital | Admissions with COVID                                                      | 610         |                             | Hospitalized compared with general population; Severe or critical compared with non-severe. Severe defined as one of: RR $\geq$ 30/min, SpO <sub>2</sub> $\leq$ 93%, FiO <sub>2</sub> $\leq$ 300mmHg, critical defined as one of: requiring MV, shock, requiring ICU care for organ support | NSE     | OR 1.20                        | 0.49-2.94                          | Fair    | Age, sex and BMI                                                     | PP                      | Yes                    |
| Gisondi, P   | XSS    | Italy       | IS         | All      | Patients with psoriasis on biologic treatment or renal transplant patients | 1223        |                             | Admission to hospital with COVID-19 compared with general population                                                                                                                                                                                                                        | NSE     | OR 0.35                        | 0.05-2.52                          | Poor    | None                                                                 | PR                      | Yes                    |
| Huh, K       | CCS    | South Korea | IS         | All      | Patients tested for COVID                                                  | 65149       | Mycophenolate and sirolimus | Positive test for SARS-CoV-2 NOS                                                                                                                                                                                                                                                            | NSE     | Myco: OR 1.00<br>Siro: OR 1.16 | Myco: 0.56-1.79<br>Siro: 0.15-8.87 | Good    | Age, sex, co-morbidities, location, healthcare usage and other drugs | PP                      | Yes                    |
| Mancia, G    | CCS    | Italy       | IS         | All      | Patients with confirmed or suspected COVID                                 | 6272        |                             | Diagnosed as per interim WHO guidelines                                                                                                                                                                                                                                                     | Harmful | OR 1.30                        | 1.20-1.42                          | Good    | Age, sex, location and co-morbidities                                | PR                      | Yes                    |

| First Author | Design | Country     | Drug Group | Setting  | Population                                 | Sample Size | Specific drugs | Outcome definitions                            | Result     | Statistic | 95% CI    | Quality | Confounders/adjusted/matched for                                               | Peer-review or Preprint | Drugs in meta-analyses |
|--------------|--------|-------------|------------|----------|--------------------------------------------|-------------|----------------|------------------------------------------------|------------|-----------|-----------|---------|--------------------------------------------------------------------------------|-------------------------|------------------------|
| Rentsch, CT  | CoS    | USA         | IS         | Hospital | VA Birth Cohort registry (54-75 years old) | 3789        |                | Positive test                                  | NSE        | OR 0.82   | 0.55-1.22 | Good    | Age, sex, race, co-morbidities, vital signs, medications and health behaviours | PP                      | Yes                    |
| Shah, SJ     | CoS    | USA         | IS         | Hospital | Respiratory admissions tested for COVID    | 316         |                | Positive test compared with negative test      | NSE        | OR 1.57   | 0.61-4.08 | Fair    | None                                                                           | PP                      | Yes                    |
| Huh, K       | CCS    | South Korea | NSAID      | All      | Patients tested for COVID                  | 65149       |                | Positive test for SARS-CoV-2 NOS               | Protective | OR 0.90   | 0.84-0.96 | Good    | Age, sex, co-morbidities, location, healthcare usage and other drugs           | PP                      | Yes                    |
| Kolin, D     | CoS    | UK          | NSAID      | All      | UK Biobank                                 | 502536      |                | Positive test compared with general population | NSE        | RR 1.02   | 0.79-1.22 | Fair    | Age, sex, BMI, systolic BP, race and deprivation                               | PP                      | Yes                    |
| Mancia, G    | CCS    | Italy       | NSAID      | All      | Patients with confirmed or suspected COVID | 6272        |                | Diagnosed as per interim WHO guidelines        | NSE        | OR 1.06   | 0.98-1.15 | Good    | Age, sex, location and co-morbidities                                          | PR                      | Yes                    |

| First Author | Design | Country     | Drug Group | Setting   | Population                                 | Sample Size | Specific drugs | Outcome definitions                                 | Result  | Statistic | 95% CI    | Quality | Confounders/matched for                                                        | Peer-review or Preprint | Drugs in meta-analyses |
|--------------|--------|-------------|------------|-----------|--------------------------------------------|-------------|----------------|-----------------------------------------------------|---------|-----------|-----------|---------|--------------------------------------------------------------------------------|-------------------------|------------------------|
| Rentsch, CT  | CoS    | USA         | NSAID      | Hospital  | VA Birth Cohort registry (54-75 years old) | 3789        |                | Positive test                                       | Harmful | OR 1.27   | 1.02-1.58 | Good    | Age, sex, race, co-morbidities, vital signs, medications and health behaviours | PP                      | Yes                    |
| Yan, H       | CCS    | China       | NSAID      | Hospital  | Admissions with COVID                      | 610         | Aspirin        | Hospitalized compared with general population       | NSE     | OR 1.25   | 0.66-2.39 | Fair    | Age, sex and BMI                                                               | PP                      | Yes                    |
| Caraballo, C | XSS    | USA         | Statin     | Community | Heart failure registry                     | 26703       |                | Symptomatic patients receiving positive test result | NSE     | OR 0.76   | 0.56-1.05 | Poor    | None                                                                           | PP                      | Yes                    |
| Huh, K       | CCS    | South Korea | Statin     | All       | Patients tested for COVID                  | 65149       |                | Positive test for SARS-CoV-2 NOS                    | NSE     | OR 0.99   | 0.89-1.10 | Good    | Age, sex, co-morbidities, location, healthcare usage and other drugs           | PP                      | Yes                    |
| Mancia, G    | CCS    | Italy       | Statin     | All       | Patients with confirmed or suspected COVID | 6272        |                | Diagnosed as per interim WHO guidelines             | NSE     | OR 1.02   | 0.94-1.10 | Good    | Age, sex, location and co-morbidities                                          | PR                      | Yes                    |
| Yan, H       | CCS    | China       | Statin     | Hospital  | Admissions with COVID                      | 610         |                | Hospitalized compared with general population       | Harmful | OR 2.50   | 1.48-4.21 | Fair    | Age, sex and BMI                                                               | PP                      | Yes                    |

| First Author | Design | Country     | Drug Group | Setting  | Population                                 | Sample Size | Specific drugs | Outcome definitions                                                                                                                            | Result  | Statistic | 95% CI    | Quality | Confounders/adjusted/matched for                                     | Peer-review or Preprint | Drugs in meta-analyses |
|--------------|--------|-------------|------------|----------|--------------------------------------------|-------------|----------------|------------------------------------------------------------------------------------------------------------------------------------------------|---------|-----------|-----------|---------|----------------------------------------------------------------------|-------------------------|------------------------|
| Huh, K       | CCS    | South Korea | TZD        | All      | Patients tested for COVID                  | 65149       |                | Positive test for SARS-CoV-2 NOS                                                                                                               | NSE     | OR 1.00   | 0.70-1.41 | Good    | Age, sex, co-morbidities, location, healthcare usage and other drugs | PP                      | Yes                    |
| Kolin, D     | CoS    | UK          | TZD        | All      | UK Biobank                                 | 502536      |                | Positive test compared with general population; Being admitted to hospital compared with those testing positive but remaining in the community | NSE     | OR 0.94   | 0.35-2.57 | Fair    | Age, sex, BMI, systolic BP, race and deprivation                     | PP                      | Yes                    |
| Mancia, G    | CCS    | Italy       | TZD        | All      | Patients with confirmed or suspected COVID | 6272        |                | Diagnosed as per interim WHO guidelines; Critical or fatal disease, critical defined as receiving MV                                           | Harmful | OR 1.81   | 1.23-2.67 | Good    | Age, sex, location and co-morbidities                                | PR                      | Yes                    |
| Yan, H       | CCS    | China       | TZD        | Hospital | Admissions with COVID                      | 610         |                | Hospitalized compared with general population                                                                                                  | NSE     | OR 0.35   | 0.11-1.13 | Fair    | Age, sex and BMI                                                     | PP                      | Yes                    |
| Khawaja, AP  | CoS    | UK          | MCRA       | All      | UK Biobank                                 | 406793      |                | Hospitalization with positive test compared with general population                                                                            | NSE     | OR 1.54   | 0.62-3.85 | Fair    | Age, sex, ethnicity and hypertension status                          | PP                      | Narrative              |
| Mancia, G    | CCS    | Italy       | MCRA       | All      | Patients with confirmed or suspected COVID | 6272        |                | Diagnosed as per interim WHO guidelines                                                                                                        | NSE     | OR 0.90   | 0.75-1.07 | Good    | Age, sex, location and co-morbidities                                | PR                      | Narrative              |

*CoS: Cohort Study, CCS: Case Control Study, XSS: Cross Sectional Study, CaseS: Case Series, NSE: No significant evidence, NVD: No verifiable data, HR: Hazard Ratio, OR: Odds Ratio, HD: high dose, LD: low dose, PR: Peer reviewed, PP: Preprint*

**Table 4. Summary of studies looking into the effect of drug groups on the severity of COVID-19 infection.**

| First Author   | Design | Country | Drug Group | Setting  | Population                                 | Sample Size | Acute or Regular | Specific drugs | Outcome definitions                                                                                                                                                                                                                       | Result                    | Statistic                       | 95% CI                            | Quality | Confounders adjusted/matched for | Peer-review or PP | Drugs in meta-analyses |
|----------------|--------|---------|------------|----------|--------------------------------------------|-------------|------------------|----------------|-------------------------------------------------------------------------------------------------------------------------------------------------------------------------------------------------------------------------------------------|---------------------------|---------------------------------|-----------------------------------|---------|----------------------------------|-------------------|------------------------|
| Argenziano, MG | CoS    | USA     | RAASB      | Hospital | ED and hospital presentations with COVID   | 1000        | Regular          | Combined       | Transfer to ICU                                                                                                                                                                                                                           | NSE                       | OR 1.11                         | 0.81-1.53                         | Fair    | None                             | PP                | Yes                    |
| Bean, DM       | CoS    | UK      | RAASB      | Hospital | Hospital admissions with COVID             | 1200        | Regular          | Combined       | Death or admission to critical care unit for organ support within 21 days of symptom onset                                                                                                                                                | Protective                | OR 0.63                         | 0.47-0.84                         | Good    | Co-morbidities, age and sex      | PP                | Yes                    |
| Benelli, G     | CoS    | Italy   | RAASB      | Hospital | Admissions with COVID                      | 411         | Regular          | ACEIs & ARBs   | Requiring NIV or CPAP                                                                                                                                                                                                                     | ACEI: Harmful<br>ARB: NSE | ACEI: OR 1.95<br>ARB: OR 1.68   | ACEI: 1.06-3.60<br>ARB: 0.94-2.99 | Fair    | None                             | PP                | Yes                    |
| Dauchet, L     | XSS    | France  | RAASB      | All      | Patients with confirmed or suspected COVID | 288         | Regular          | ACEIs & ARBs   | ICU admission; Being put through to emergency line due to symptoms                                                                                                                                                                        | ACEI: NSE<br>ARB: Harmful | ACEI: SPR 0.95<br>ARB: SPR 1.56 | ACEI: 0.55-1.64<br>ARB: 1.02-2.39 | Good    | None                             | PP                | Yes                    |
| Feng, Y        | XSS    | China   | RAASB      | Hospital | Admissions with COVID                      | 476         | Regular          | Combined       | Critical compared with moderate: critical defined as respiratory failure requiring MV, shock or requiring ICU care. Moderate defined as fever, cough and pneumonia on chest CT but RR<30/min, SpO2>93% and FiO2 >300mmHg (i.e not severe) | Protective                | OR 0.17                         | 0.05-0.52                         | Fair    | None                             | PR                | Yes                    |

| First Author | Design    | Country | Drug Group | Setting  | Population                                 | Sample Size | Acute or Regular | Specific drugs | Outcome definitions                                                                                                                                                                                                     | Result | Statistic                           | 95% CI                                  | Quality | Confounders adjusted/matched for                                                                         | Peer-review or PP | Drugs in meta-analyses |
|--------------|-----------|---------|------------|----------|--------------------------------------------|-------------|------------------|----------------|-------------------------------------------------------------------------------------------------------------------------------------------------------------------------------------------------------------------------|--------|-------------------------------------|-----------------------------------------|---------|----------------------------------------------------------------------------------------------------------|-------------------|------------------------|
| Feng, Z      | CoS       | China   | RAA<br>SB  | Hospital | Admissions with COVID                      | 564         | Regular          | Combined       | Severe or critical compared with non-severe. Severe defined as one of: RR $\geq$ 30/min, SpO2 $\leq$ 93%, FiO2 $\leq$ 300mmHg, critical defined as one of: requiring MV, shock, requiring ICU care for organ support    | NSE    | OR 0.41                             | 0.05-3.19                               | Good    | Propensity score matched and adjusted for age, gender, smoking history, co-morbidities and lung CT score | PP                | Yes                    |
| Kolin, D     | CoS       | UK      | RAA<br>SB  | All      | UK Biobank                                 | 502536      | Regular          | ACEIs & ARBs   | Being admitted to hospital compared with those testing positive but remaining in the community                                                                                                                          | NSE    | ACEI:<br>0.56<br>ARB:<br>0.60       | ACEI:<br>0.26-1.22<br>ARB:<br>0.25-1.42 | Fair    | Age, sex, BMI, systolic BP, race and deprivation                                                         | PP                | Yes                    |
| Li, J        | Case<br>S | China   | RAA<br>SB  | Hospital | Hypertensive COVID admissions              | 1178        | Regular          | Combined       | Severe compared with non-severe. Severe defined as one of: RR $\geq$ 30/min, SpO2 $\leq$ 93%, FiO2 $\leq$ 300mmHg, lung infiltrates more than 50% within 24 to 48 hours, respiratory failure and/or multi-organ failure | NSE    | OR 1.11                             | 0.71-1.73                               | Good    | None                                                                                                     | PR                | Yes                    |
| Li, X        | CoS       | China   | RAA<br>SB  | Hospital | Admissions with COVID                      | 548         | Regular          | Combined       | Severe or critical compared with non-severe. Severe defined as per IDSA & ATS guidelines for CAP                                                                                                                        | NSE    | OR 0.86                             | 0.45-1.61                               | Good    | Age, sex, blood tests, antiviral usage                                                                   | PR                | Yes                    |
| Liu, Yingxia | CoS       | China   | RAA<br>SB  | Hospital | Hypertensive COVID admissions              | 78          | Regular          | ACEIs & ARBs   | Severe compared with non-severe as per NHCPRC 2019-nCoV guidelines                                                                                                                                                      | NSE    | ACEI:<br>OR 0.57<br>ARB: OR<br>0.54 | ACEI:<br>0.11-2.95<br>ARB:<br>0.25-1.16 | Fair    | Sex                                                                                                      | PP                | Yes                    |
| Mancia, G    | CCS       | Italy   | RAA<br>SB  | All      | Patients with confirmed or suspected COVID | 6272        | Regular          | ACEIs & ARBs   | Critical or fatal disease, critical defined as receiving MV                                                                                                                                                             | NSE    | ACEI:<br>OR 0.91<br>ARB: OR<br>0.83 | ACEI:<br>0.69-1.21<br>ARB:<br>0.63-1.10 | Good    | Age, sex, location and co-morbidities                                                                    | PR                | Yes                    |

| First Author | Design | Country | Drug Group | Setting  | Population                                 | Sample Size | Acute or Regular | Specific drugs | Outcome definitions                                                                                                                                                                                                                                            | Result | Statistic                     | 95% CI                            | Quality | Confounders adjusted/matched for                                              | Peer-review or PP | Drugs in meta-analyses |
|--------------|--------|---------|------------|----------|--------------------------------------------|-------------|------------------|----------------|----------------------------------------------------------------------------------------------------------------------------------------------------------------------------------------------------------------------------------------------------------------|--------|-------------------------------|-----------------------------------|---------|-------------------------------------------------------------------------------|-------------------|------------------------|
| Meng, J      | CoS    | China   | RAA<br>SB  | Hospital | Hypertensive COVID admissions              | 42          | Regular          | Combined       | Severe disease or death, severe defined as per NHCPRC 2019-nCoV guidelines                                                                                                                                                                                     | NSE    | OR 0.28                       | 0.07-1.12                         | Fair    | None                                                                          | PR                | Yes                    |
| Rentsch, CT  | CoS    | USA     | RAA<br>SB  | Hospital | VA Birth Cohort registry (54-75 years old) | 3789        | Regular          | Combined       | Hospitalization compared with community care after testing positive                                                                                                                                                                                            | NSE    | OR 1.15                       | 0.71-1.87                         | Good    | Age, sex, race, comorbidities, vital signs, medications and health behaviours | PP                | Yes                    |
| Reynolds, HR | CoS    | USA     | RAA<br>SB  | All      | Patients tested for COVID                  | 12594       | Regular          | ACEIs & ARBs   | ICU admission, MV or death                                                                                                                                                                                                                                     | NSE    | ACEI: OR 0.90<br>ARB: OR 0.99 | ACEI: 0.70-1.14<br>ARB: 0.79-1.25 | Good    | Age, sex, race, BMI, smoking history, comorbidities and treatment             | PR                | Yes                    |
| Yan, H       | CCS    | China   | RAA<br>SB  | Hospital | Admissions with COVID                      | 610         | Regular          | ACEIs & ARBs   | Severe or critical compared with non-severe. Severe defined as one of: RR $\geq 30/\text{min}$ , SpO <sub>2</sub> $\leq 93\%$ , FiO <sub>2</sub> $\leq 300\text{mmHg}$ , critical defined as one of: requiring MV, shock, requiring ICU care for organ support | NSE    | ACEI: OR 1.23<br>ARB: OR 0.77 | ACEI: 0.19-7.93<br>ARB: 0.36-1.63 | Fair    | Age, sex and BMI                                                              | PP                | Yes                    |
| Yang, G      | CoS    | China   | RAA<br>SB  | Hospital | Hypertensive COVID admissions              | 126         | Regular          | Combined       | Severe or critical compared with non-severe. Severe defined as one of: RR $\geq 30/\text{min}$ , SpO <sub>2</sub> $\leq 93\%$ , FiO <sub>2</sub> $\leq 300\text{mmHg}$ , critical defined as one of: requiring MV, shock, requiring ICU care for organ support | NSE    | OR 0.73                       | 0.34-1.58                         | Fair    | None                                                                          | PP                | Yes                    |
| Zeng, Z      | CoS    | China   | RAA<br>SB  | Hospital | Hypertensive COVID Admissions              | 75          | Regular          | Combined       | Severe compared with non-severe. Severe defined as per IDSA & ATS guidelines for CAP                                                                                                                                                                           | NSE    | OR 2.46                       | 0.94-6.45                         | Poor    | None                                                                          | PP                | Yes                    |



| First Author   | Design | Country | Drug Group | Setting  | Population                               | Sample Size | Acute or Regular | Specific drugs                | Outcome definitions                                                                                                                                                                                                                        | Result     | Statistic                     | 95% CI                            | Quality | Confounders adjusted/matched for           | Peer-review or PP | Drugs in meta-analyses        |
|----------------|--------|---------|------------|----------|------------------------------------------|-------------|------------------|-------------------------------|--------------------------------------------------------------------------------------------------------------------------------------------------------------------------------------------------------------------------------------------|------------|-------------------------------|-----------------------------------|---------|--------------------------------------------|-------------------|-------------------------------|
| Argenziano, MG | CoS    | USA     | CS         | Hospital | ED and hospital presentations with COVID | 1000        | Regular          | Inhaled, nasal, oral steroids | Transfer to ICU                                                                                                                                                                                                                            | NSE        | OR 1.06                       | 0.59-1.90                         | Fair    | None                                       | PP                | Yes                           |
| Cao, C         | CoS    | China   | CS         | Hospital | Admissions with mild-moderate COVID      | 58          | Acute            | Methylprednisolone            | Severe compared with non-severe. Severe defined as one of: RR $\geq$ 33/min, SpO <sub>2</sub> $\leq$ 94% at rest, PO <sub>2</sub> /FiO <sub>2</sub> $\leq$ 300mmHg, requiring MV, developing shock or multiple organ failure requiring ICU | Protective | OR 0.14                       | 0.02-0.80                         | Fair    | None                                       | PP                | Narrative                     |
| Li, X          | CoS    | China   | CS         | Hospital | Admissions with COVID                    | 548         | Regular          | Oral                          | Severe or critical compared with non-severe. Severe defined as per IDSA & ATS guidelines for CAP                                                                                                                                           | NSE        | Oral: OR 0.51<br>Inh: OR 0.69 | Oral: 0.09-2.84<br>Inh: 0.11-4.16 | Good    | Age, sex, blood tests, antiviral usage     | PR                | Yes                           |
| Liu, Yanli     | CoS    | China   | CS         | Hospital | Admissions with COVID                    | 109         | Acute            |                               | Berlin definition of ARDS                                                                                                                                                                                                                  | NSE        | OR 1.38                       | 0.64-2.98                         | Fair    | None                                       | PP                | Narrative                     |
| Lui, GCY       | CoS    | China   | CS         | Hospital | Admissions with COVID                    | 114         | Acute            | Methylprednisolone            | ICU admission, MV or death                                                                                                                                                                                                                 | Harmful    | HR 4.17                       | 1.23-14.11                        | Poor    | Age, sex, co-morbidities and blood markers | PP                | OR incalculable or inaccurate |
| Robilotti, EV  | CoS    | USA     | CS         | Hospital | Cancer patients with symptomatic COVID   | 423         | Regular          | Steroids or lymphopaenia      | Requiring high-flow oxygen or MV                                                                                                                                                                                                           | NSE        | OR 1.52                       | 0.92-2.50                         | Fair    | Age, race, treatment and co-morbidities    | PP                | Yes                           |
| Wang, D        | CoS    | China   | CS         | Hospital | Admissions with COVID                    | 115         | Acute            | Methylprednisolone            | ICU admission or death                                                                                                                                                                                                                     | NSE        | OR 2.16                       | 0.49-9.43                         | Poor    | Age, sex, co-morbidities and blood markers | PP                | Narrative                     |

| First Author | Design | Country | Drug Group | Setting  | Population                                 | Sample Size | Acute or Regular | Specific drugs | Outcome definitions                                                                                                                                                                                                                                                                         | Result     | Statistic | 95% CI     | Quality | Confounders adjusted/matched for                                              | Peer-review or PP | Drugs in meta-analyses        |
|--------------|--------|---------|------------|----------|--------------------------------------------|-------------|------------------|----------------|---------------------------------------------------------------------------------------------------------------------------------------------------------------------------------------------------------------------------------------------------------------------------------------------|------------|-----------|------------|---------|-------------------------------------------------------------------------------|-------------------|-------------------------------|
| Yan, H       | CCS    | China   | CS         | Hospital | Admissions with COVID                      | 610         | Regular          |                | Hospitalized compared with general population; Severe or critical compared with non-severe. Severe defined as one of: RR $\geq$ 30/min, SpO <sub>2</sub> $\leq$ 93%, FiO <sub>2</sub> $\leq$ 300mmHg, critical defined as one of: requiring MV, shock, requiring ICU care for organ support | Harmful    | OR 7.56   | 1.17-48.93 | Fair    | Age, sex and BMI                                                              | PP                | Yes                           |
| Yi, P        | CoS    | China   | CS         | Hospital | Admissions with COVID                      | 100         | Acute            |                | Severe or critical compared with non-severe. Severe defined as one of: RR $\geq$ 30/min, SpO <sub>2</sub> $\leq$ 93%, FiO <sub>2</sub> $\leq$ 300mmHg, critical defined as one of: requiring MV, shock, requiring ICU care for organ support                                                | NSE        | -         | -          | Fair    | Age and BMI                                                                   | PP                | OR incalculable or inaccurate |
| Li, X        | CoS    | China   | IS         | Hospital | Admissions with COVID                      | 548         | Regular          |                | Severe or critical compared with non-severe. Severe defined as per IDSA & ATS guidelines for CAP                                                                                                                                                                                            | NSE        | OR 0.35   | 0.11-4.16  | Good    | Age, sex, blood tests, antiviral usage                                        | PR                | Yes                           |
| Monreal, E   | CoS    | Spain   | IS         | Hospital | Admissions with COVID                      | 138         | Regular          |                | Berlin definition for ARDS                                                                                                                                                                                                                                                                  | Protective | OR 0.16   | 0.05-0.52  | Fair    | Age, sex and time of onset                                                    | PP                | Yes                           |
| Rentsch, CT  | CoS    | USA     | IS         | Hospital | VA Birth Cohort registry (54-75 years old) | 3789        | Regular          |                | Hospitalization compared with community care after testing positive                                                                                                                                                                                                                         | NSE        | OR 1.62   | 0.75-3.50  | Good    | Age, sex, race, comorbidities, vital signs, medications and health behaviours | PP                | Yes                           |

| First Author   | Design | Country | Drug Group | Setting   | Population                               | Sample Size | Acute or Regular | Specific drugs                 | Outcome definitions                                                                                                                                                                                                    | Result                 | Statistic                                    | 95% CI                                             | Quality | Confounders adjusted/matched for          | Peer-review or PP | Drugs in meta-analyses        |
|----------------|--------|---------|------------|-----------|------------------------------------------|-------------|------------------|--------------------------------|------------------------------------------------------------------------------------------------------------------------------------------------------------------------------------------------------------------------|------------------------|----------------------------------------------|----------------------------------------------------|---------|-------------------------------------------|-------------------|-------------------------------|
| Robilotti, EV  | CoS    | USA     | IS         | Hospital  | Cancer patients with symptomatic COVID   | 423         | Regular          | Chemotherapy                   | Requiring high-flow oxygen or MV                                                                                                                                                                                       | NSE                    | OR 1.16                                      | 0.76-1.78                                          | Fair    | Age, race, treatment and co-morbidities   | PP                | Yes                           |
| Roumier, M     | CCS    | France  | IS         | Hospital  | Admissions with COVID                    | 60          | Acute            | Tocilizumab                    | Requiring MV                                                                                                                                                                                                           | Protective             | OR 0.42                                      | 0.20-0.89                                          | Fair    | Matched for age, sex and severity         | PP                | No                            |
| Zhu, L         | CCS    | China   | IS         | Hospital  | Renal transplant admissions with COVID   | 10          | Regular          |                                | Severe compared with non-severe. Severe defined as per 7th edition of NHCPRC 7th version; Time from onset to shedding (unclear); Recovery compared with death                                                          | Harmful                | -                                            | -                                                  | Fair    | None                                      | PR                | OR incalculable or inaccurate |
| Argenziano, MG | CoS    | USA     | NSAID      | Hospital  | ED and hospital presentations with COVID | 1000        | Regular          |                                | Transfer to ICU                                                                                                                                                                                                        | NSE                    | OR 0.78                                      | 0.55-1.11                                          | Fair    | None                                      | PP                | Yes                           |
| Castro, VM     | XSS    | USA     | NSAID      | Community | Patients tested for COVID                | 2271        | Regular          | Ibuprofen, naproxen, ketorolac | Being admitted to hospital compared with those testing positive but remaining in the community                                                                                                                         | Protective and harmful | Ibu: OR 0.65<br>Nap: OR 0.39<br>Ket: OR 1.70 | Ibu: 0.42-0.99<br>Nap: 0.14-0.93<br>Ket: 1.03-2.78 | Good    | Age, sex, race, Charlston index, location | PP                | Yes                           |
| Hong, W        | CoS    | China   | NSAID      | Hospital  | Admissions with COVID                    | 44          | Acute            | Celecoxib                      | Progression to severe or critical disease. Severe defined as one of: RR $\geq 30$ /min, SpO2 $\leq 93\%$ , FiO2 $\leq 300$ mmHg. Critical defined as one of: requiring MV, shock, requiring ICU care for organ support | NSE                    | -                                            | -                                                  | Poor    | None                                      | PP                | No                            |

| First Author   | Design | Country | Drug Group | Setting  | Population                                              | Sample Size | Acute or Regular | Specific drugs | Outcome definitions                                                                                                                                                                                                                                            | Result                 | Statistic | 95% CI    | Quality | Confounders adjusted/matched for                                               | Peer-review or PP | Drugs in meta-analyses |
|----------------|--------|---------|------------|----------|---------------------------------------------------------|-------------|------------------|----------------|----------------------------------------------------------------------------------------------------------------------------------------------------------------------------------------------------------------------------------------------------------------|------------------------|-----------|-----------|---------|--------------------------------------------------------------------------------|-------------------|------------------------|
| Kolin, D       | CoS    | UK      | NSAID      | All      | UK Biobank                                              | 502536      | Regular          |                | Being admitted to hospital compared with those testing positive but remaining in the community                                                                                                                                                                 | NSE                    | RR 0.75   | 0.47-1.18 | Fair    | Age, sex, BMI, systolic BP, race and deprivation                               | PP                | Yes                    |
| Kragholm, K    | CCS    | Denmark | NSAID      | All      | National registry (>30 years old without heart failure) | 1872        | Regular          | Ibuprofen      | Severe disease, ICU admission or death. Severe disease defined as ICD-10 code for severe adult respiratory syndrome                                                                                                                                            | NSE                    | OR 1.57   | 0.72-3.38 | Fair    | Age, sex and co-morbidities                                                    | PP                | Yes                    |
| Rentsch, CT    | CoS    | USA     | NSAID      | Hospital | VA Birth Cohort registry (54-75 years old)              | 3789        | Regular          |                | Hospitalization compared with community care after testing positive                                                                                                                                                                                            | Harmful                | OR 1.18   | 0.74-1.89 | Good    | Age, sex, race, co-morbidities, vital signs, medications and health behaviours | PP                | Yes                    |
| Yan, H         | CCS    | China   | NSAID      | Hospital | Admissions with COVID                                   | 610         | Regular          | Aspirin        | Severe or critical compared with non-severe. Severe defined as one of: RR $\geq 30/\text{min}$ , SpO <sub>2</sub> $\leq 93\%$ , FiO <sub>2</sub> $\leq 300\text{mmHg}$ , critical defined as one of: requiring MV, shock, requiring ICU care for organ support | Protective and harmful | OR 0.51   | 0.12-2.13 | Fair    | Age, sex and BMI                                                               | PP                | Yes                    |
| Argenziano, MG | CoS    | USA     | Statin     | Hospital | ED and hospital presentations with COVID                | 1000        | Regular          |                | Transfer to ICU                                                                                                                                                                                                                                                | NSE                    | OR 1.20   | 0.89-1.63 | Fair    | None                                                                           | PP                | Narrative              |
| Yan, H         | CCS    | China   | Statin     | Hospital | Admissions with COVID                                   | 610         | Regular          |                | Severe or critical compared with non-severe. Severe defined as one of: RR $\geq 30/\text{min}$ , SpO <sub>2</sub> $\leq 93\%$ , FiO <sub>2</sub> $\leq 300\text{mmHg}$ , critical defined as one of: requiring MV, shock, requiring ICU care for organ support | Harmful                | OR 0.98   | 0.32-2.99 | Fair    | Age, sex and BMI                                                               | PP                | Narrative              |

| First Author | Design | Country | Drug Group | Setting  | Population            | Sample Size | Acute or Regular | Specific drugs | Outcome definitions                                                                                                                                                                                                                                            | Result | Statistic | 95% CI     | Quality | Confounders adjusted/matched for | Peer-review or PP | Drugs in meta-analyses |
|--------------|--------|---------|------------|----------|-----------------------|-------------|------------------|----------------|----------------------------------------------------------------------------------------------------------------------------------------------------------------------------------------------------------------------------------------------------------------|--------|-----------|------------|---------|----------------------------------|-------------------|------------------------|
| Yan, H       | CCS    | China   | TZD        | Hospital | Admissions with COVID | 610         | Regular          |                | Severe or critical compared with non-severe. Severe defined as one of: RR $\geq 30/\text{min}$ , SpO <sub>2</sub> $\leq 93\%$ , FiO <sub>2</sub> $\leq 300\text{mmHg}$ , critical defined as one of: requiring MV, shock, requiring ICU care for organ support | NSE    | OR 4.52   | 0.34-59.54 | Fair    | Age, sex and BMI                 | PP                | Yes                    |

CoS: Cohort Study, CCS: Case Control Study, XSS: Cross Sectional Study, CaseS: Case Series, NSE: No significant evidence, NVD: No verifiable data, HR: Hazard Ratio, OR: Odds Ratio, HD: high dose, LD: low dose, PR: Peer reviewed, PP: Preprint

**Table 5. Summary of studies looking into the effect of drug groups on the mortality from COVID-19 infection**

| First Author          | Design | Country     | Drug Group | Setting  | Population                                     | Sample Size | Acute or Regular | Outcome definitions                            | Result     | Statistic                     | 95% CI                            | Quality | Confounders adjusted/ matched for | Peer-review or Preprint | Drugs in meta-analyses |
|-----------------------|--------|-------------|------------|----------|------------------------------------------------|-------------|------------------|------------------------------------------------|------------|-------------------------------|-----------------------------------|---------|-----------------------------------|-------------------------|------------------------|
| Benelli, G            | CoS    | Italy       | RAA SB     | Hospital | Admissions with COVID                          | 411         | Regular          | Deaths compared with discharges and inpatients | NSE        | ACEI: OR 1.39<br>ARB: OR 1.54 | ACEI: 0.67-2.86<br>ARB: 0.79-2.98 | Fair    | None                              | PP                      | Yes                    |
| Chen, Ming            | CCS    | China       | RAA SB     | Hospital | Deaths and discharges from hospital with COVID | 123         | Regular          | Deaths compared with discharges                | NSE        | OR 1.13                       | 0.28-4.54                         | Fair    | None                              | PP                      | Yes                    |
| Guo, T                | XSS    | China       | RAA SB     | Hospital | Admissions with COVID                          | 187         | Regular          | Deaths compared with discharges                | NSE        | OR 1.70                       | 0.63-4.58                         | Fair    | None                              | PR                      | Yes                    |
| Ip, A                 | CCS    | USA         | RAA SB     | Hospital | Hypertensive COVID discharges and deaths       | 1216        | Regular          | Deaths compared with discharges                | Protective | OR 0.66                       | 0.51-0.85                         | Poor    | None                              | PP                      | Yes                    |
| Lee, HY               | CoS    | South Korea | RAA SB     | All      | Patients with lab confirmed COVID              | 8266        | Regular          | Mortality within 60 days                       | NSE        | HR 1.07                       | 0.68-1.65                         | Good    | Age, sex and co-morbidities       | PP                      | Narrative              |
| Li, J                 | CaseS  | China       | RAA SB     | Hospital | Hypertensive COVID admissions                  | 1178        | Regular          | In hospital death compared with discharges     | NSE        | OR 0.76                       | 0.44-1.33                         | Good    | None                              | PR                      | Yes                    |
| Richardson, S         | CaseS  | USA         | RAA SB     | Hospital | Hypertensive COVID discharges and deaths       | 5700        | Regular          | In hospital death compared with discharges     | NSE        | ACEI: OR 1.34<br>ARB: OR 1.21 | ACEI: 0.94-1.91<br>ARB: 0.89-1.65 | Fair    | None                              | PR                      | Yes                    |
| Sánchez - Álvarez, JE | XSS    | Spain       | RAA SB     | All      | Renal replacement patients with COVID          | 375         | Regular          | In hospital death compared with cured cases    | Protective | OR 0.59                       | 0.39-0.90                         | Poor    | None                              | PR                      | Yes                    |

| First Author | Design   | Country | Drug Group | Setting  | Population                                     | Sample Size | Acute or Regular | Outcome definitions                                                                             | Result                 | Statistic                 | 95% CI                         | Quality | Confounders adjusted/ matched for                                                                                                                | Peer-review or Preprint | Drugs in meta-analyses        |
|--------------|----------|---------|------------|----------|------------------------------------------------|-------------|------------------|-------------------------------------------------------------------------------------------------|------------------------|---------------------------|--------------------------------|---------|--------------------------------------------------------------------------------------------------------------------------------------------------|-------------------------|-------------------------------|
| Yang, G      | CoS      | China   | RAA SB     | Hospital | Hypertensive COVID admissions                  | 126         | Regular          | Deaths compared with discharges and inpatients                                                  | NSE                    | OR 0.32                   | 0.07-1.51                      | Fair    | None                                                                                                                                             | PP                      | Yes                           |
| Zhang, P     | CoS      | China   | RAA SB     | Hospital | Hypertensive COVID admissions                  | 1128        | Regular          | 28 day mortality                                                                                | Protective             | HR 0.37                   | 0.15-0.89                      | Good    | Matched for age, sex, symptoms, co-morbidities, CT findings, CRP and creatinine. Adjusted for location, treatment, D-Dimer and unilateral lesion | PR                      | Narrative                     |
| Cao, J       | CoS      | China   | CS         | Hospital | Admissions with COVID                          | 102         | Acute            | All deaths occurring in data collection period compared with those discharged                   | NSE                    | OR 2.06                   | 0.70-6.09                      | Fair    | None                                                                                                                                             | PR                      | Yes                           |
| Chen, Ming   | CCS      | China   | CS         | Hospital | Deaths and discharges from hospital with COVID | 123         | Acute            | Deaths compared with discharges                                                                 | Harmful                | OR 4.75                   | 1.78-12.66                     | Fair    | None                                                                                                                                             | PP                      | Yes                           |
| Li, X        | CoS      | China   | CS         | Hospital | Admissions with COVID                          | 548         | Acute            | Deaths at any point from admission until final date of follow up (4 weeks after last admission) | HD: Harmful<br>LD: NSE | HD: HR 3.5<br>LD: HR 1.26 | HD: 1.79-6.86<br>LD: 0.61-2.58 | Good    | Age, sex, blood tests, antiviral usage                                                                                                           | PR                      | Narrative                     |
| Liang, M     | CoS/ CCS | China   | CS         | Hospital | Admissions with COVID                          | 120         | Acute            | Death during hospital stay                                                                      | NSE                    | OR 0.65                   | 0.10-4.14                      | Good    | None                                                                                                                                             | PP                      | Yes                           |
| Liu, Yanli   | CoS      | China   | CS         | Hospital | Admissions with COVID                          | 109         | Acute            | Deaths compared with discharges                                                                 | NSE                    | -                         | -                              | Fair    | None                                                                                                                                             | PP                      | OR incalculable or inaccurate |
| Lu, X        | CoS      | China   | CS         | ICU      | Critical COVID discharges and deaths           | 244         | Acute            | 28 day mortality                                                                                | NSE                    | -                         | -                              | Good    | Propensity score matched and adjusted for age, SpO2 and lymphocyte count                                                                         | PP                      | OR incalculable or inaccurate |

| First Author          | Design | Country | Drug Group | Setting  | Population                            | Sample Size | Acute or Regular | Outcome definitions                                           | Result     | Statistic | 95% CI    | Quality | Confounders adjusted/ matched for | Peer-review or Preprint | Drugs in meta-analyses |
|-----------------------|--------|---------|------------|----------|---------------------------------------|-------------|------------------|---------------------------------------------------------------|------------|-----------|-----------|---------|-----------------------------------|-------------------------|------------------------|
| Sánchez - Álvarez, JE | XSS    | Spain   | CS         | All      | Renal replacement patients with COVID | 375         | Acute            | In hospital death compared with cured cases                   | Harmful    | OR 1.81   | 1.12-2.91 | Poor    | None                              | PR                      | Yes                    |
| Wu, C                 | CoS    | China   | CS         | Hospital | COVID patients with ARDS              | 201         | Acute            | Death at any point up to 18 days after recruitment            | Protective | HR 0.38   | 0.20-0.72 | Fair    | None                              | PR                      | Yes                    |
| Zhang, S              | CoS    | China   | CS         | Hospital | Admissions with COVID                 | 262         | Acute            | 28 day mortality                                              | Harmful    | OR 4.97   | 2.85-8.45 | Poor    | None                              | PP                      | Yes                    |
| Zhou, F               | CoS    | China   | CS         | Hospital | Admissions with COVID                 | 191         | Acute            | Deaths compared with discharges                               | Harmful    | OR 3.18   | 1.63-6.19 | Poor    | None                              | PR                      | Yes                    |
| Monreal, E            | CoS    | Spain   | IS         | Hospital | Admissions with COVID                 | 138         | Regular          | Deaths compared with those with a final outcome               | NSE        |           |           | Fair    | Age, sex and time of onset        | PP                      | Yes                    |
| Roumier, M            | CCS    | France  | IS         | Hospital | Admissions with COVID                 | 60          | Acute            | In-hospital deaths within 2 days of end of recruitment period | NSE        |           |           | Fair    | Matched for age, sex and severity | PP                      | No                     |

CoS: Cohort Study, CCS: Case Control Study, XSS: Cross Sectional Study, CaseS: Case Series, NSE: No significant evidence, NVD: No verifiable data, HR: Hazard Ratio, OR: Odds Ratio, HD: high dose, LD: low dose, PR: Peer reviewed, PP: Preprint



## Appendix 4: funnel plots

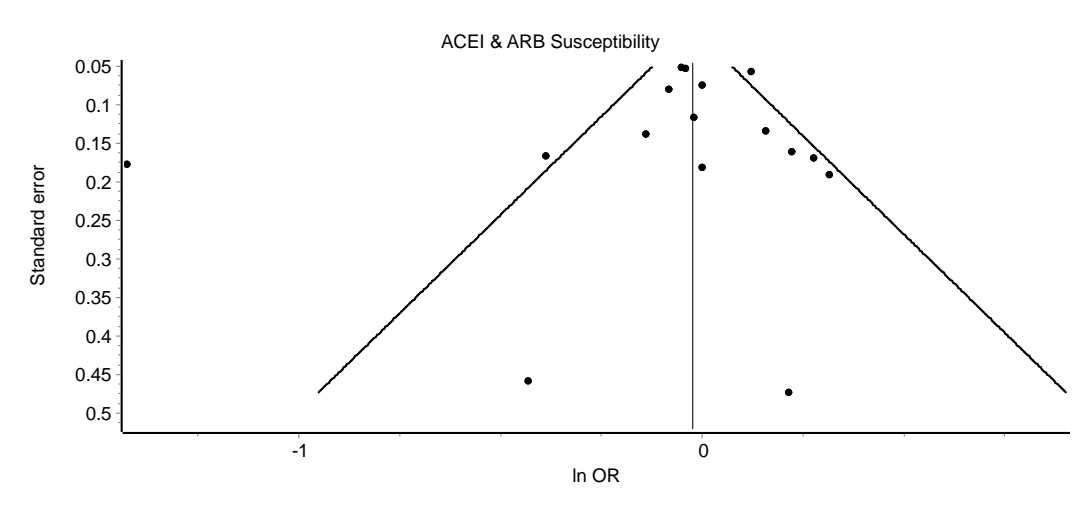

**Fig 12.** Funnel plot to assess for publication bias from studies measuring susceptibility to COVID-19 in those taking RAASBs. ACEI – angiotensin-converting enzyme inhibitor, ARB – angiotensin-II-receptor blocker, OR – odds ratio.

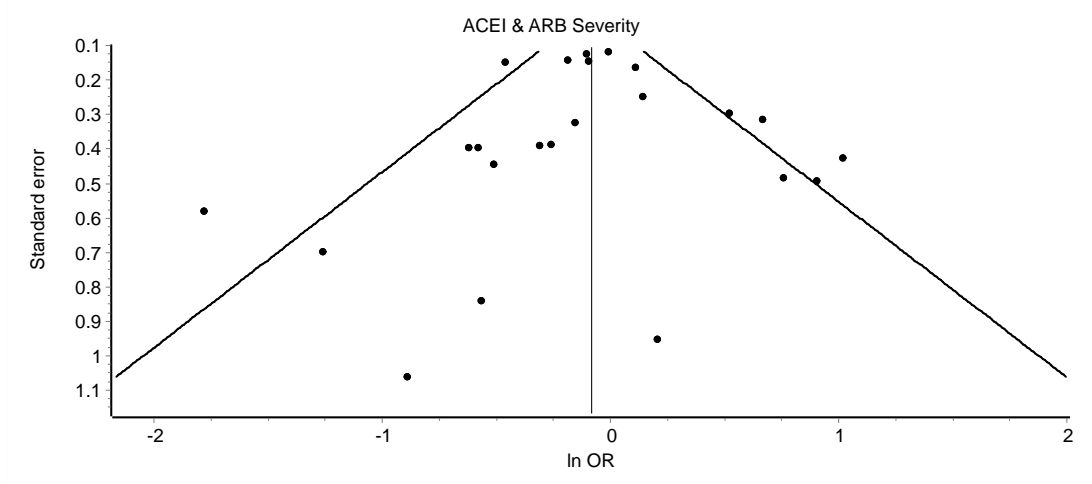

**Fig 13.** Funnel plot to assess for publication bias from studies measuring severity of COVID-19 in those taking RAASBs. ACEI – angiotensin-converting enzyme inhibitor, ARB – angiotensin-II-receptor blocker, OR – odds ratio.

## Appendix 5: data collection table headings

|                                                                       |
|-----------------------------------------------------------------------|
| Result (#)                                                            |
| Study (#)                                                             |
| First Author                                                          |
| Journal                                                               |
| Type (Peer reviewed or preprint)                                      |
| Date                                                                  |
| Country                                                               |
| Setting (Hospital, community or both)                                 |
| Sample Size                                                           |
| Drug Group                                                            |
| Specific Drug(s)                                                      |
| Regular or Acute                                                      |
| Study Design                                                          |
| Population Demographic                                                |
| Cited by (#)                                                          |
| Outcome (1-6)                                                         |
| Significance (harm, benefit or no statistically significant evidence) |
| Odds Ratio/Relative Risk                                              |
| p-value                                                               |
| Confidence Intervals                                                  |
| Control Group                                                         |
| Subgroup(s) Affected                                                  |
| Identified Confounding Factors                                        |
| Comments                                                              |

## Appendix 6: forest plots

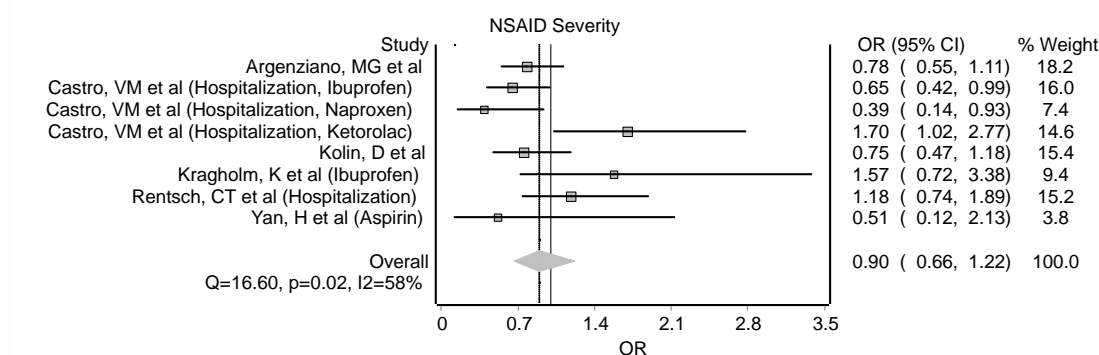

**Fig 14. Forest plot for effect of NSAIDs on severity of COVID-19.** NSAID – non-steroidal anti-inflammatory drug, OR – odds ratio, CI – confidence interval.

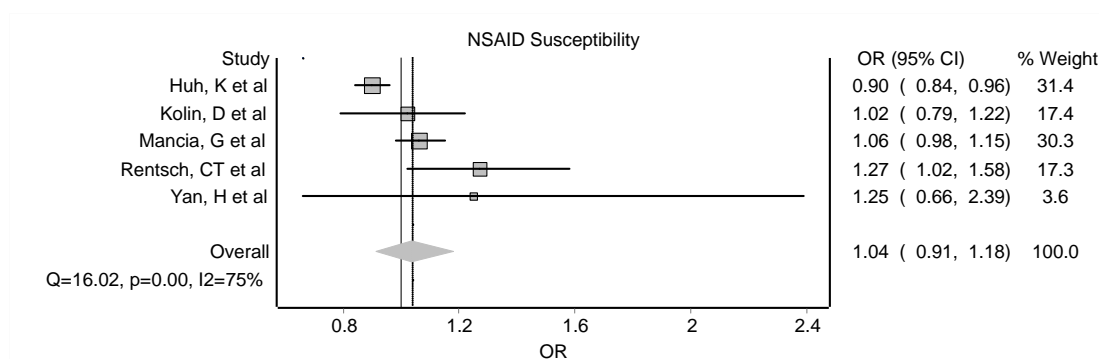

**Fig 15. Forest plot for effect of NSAIDs on susceptibility to COVID-19.** NSAID – non-steroidal anti-inflammatory drug, OR – odds ratio, CI – confidence interval.

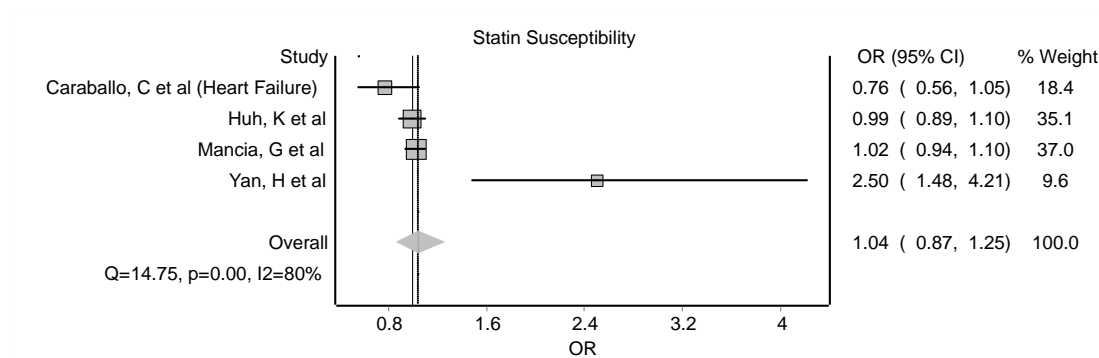

**Fig 16. Forest plot for effect of statins on susceptibility to COVID-19.** OR – odds ratio, CI – confidence interval.

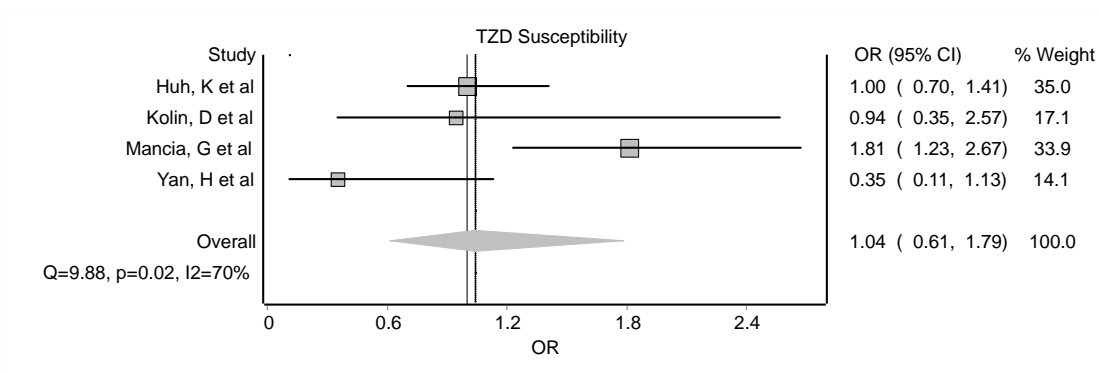

**Fig 17 . Forest plot for effect of TZDs on susceptibility to COVID-19. TZD - thiazolidinediones, OR – odds ratio, CI – confidence interval.**

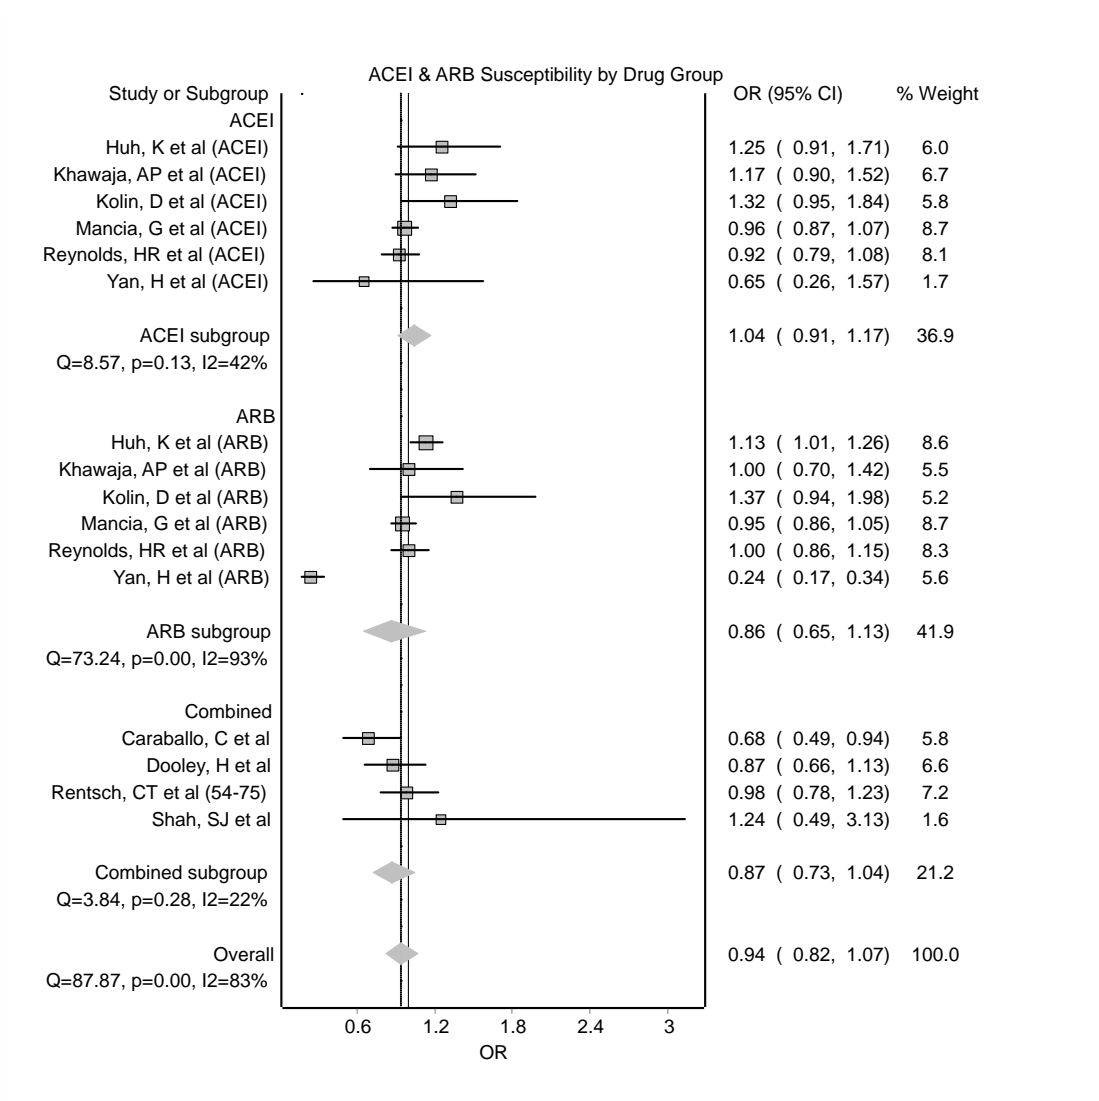

**Fig 18. Forest plot of susceptibility to COVID-19 for those taking regular RAAS blockers, split by drug group. ACEI – angiotensin-converting enzyme inhibitor, ARB – angiotensin-II-receptor blocker, OR – odds ratio, CI – confidence interval.**

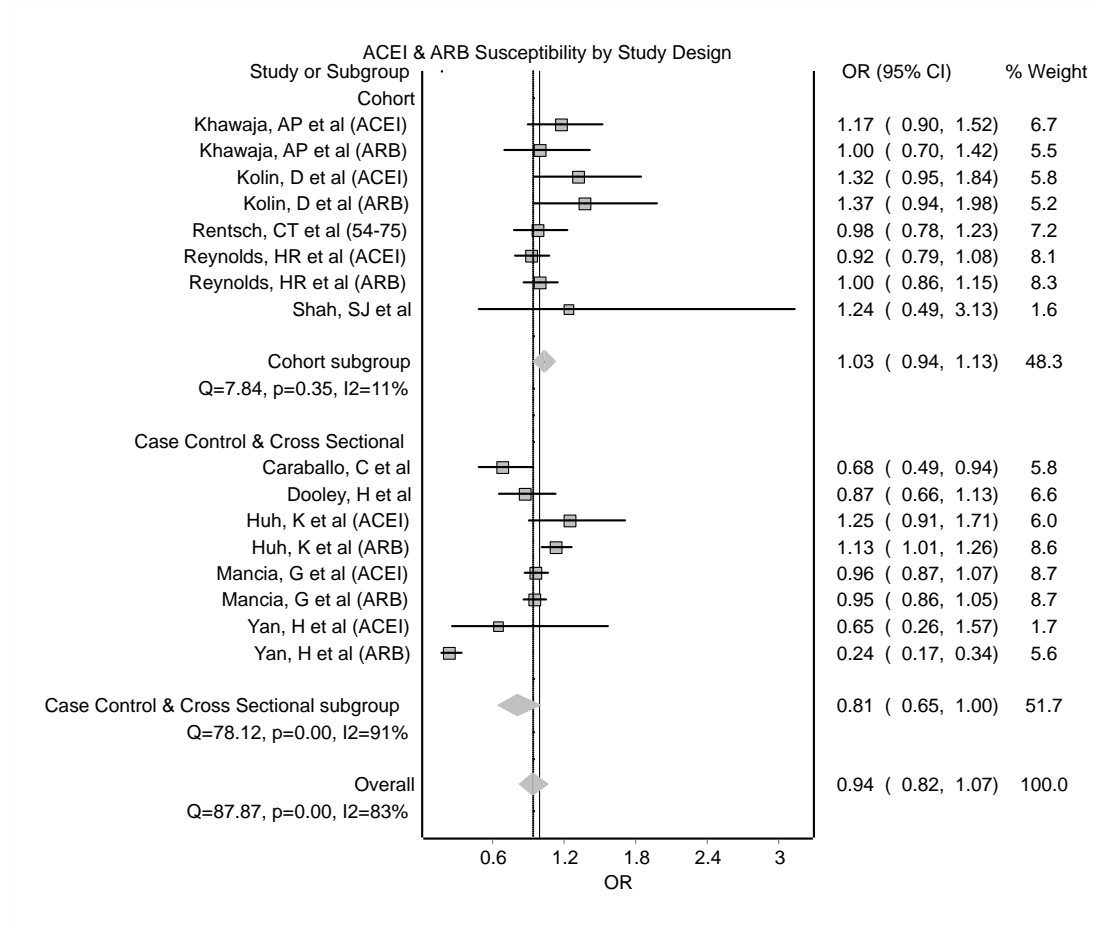

**Fig 19. Forest plot of susceptibility to COVID-19 for those taking regular RAAS blockers, split by study design. ACEI – angiotensin-converting enzyme inhibitor, ARB – angiotensin-II-receptor blocker, OR – odds ratio, CI – confidence interval.**

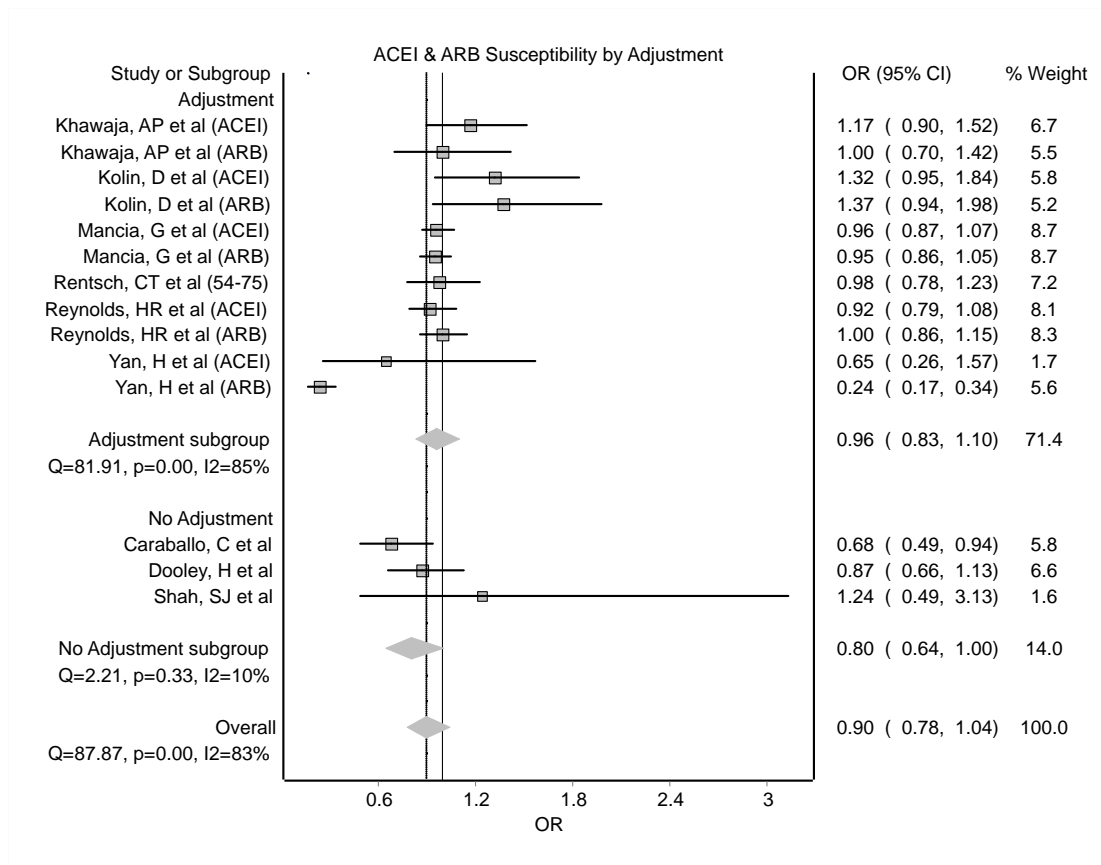

**Fig 20. Forest plot of susceptibility to COVID-19 for those taking regular RAAS blockers, split by level of adjustment. ACEI – angiotensin-converting enzyme inhibitor, ARB – angiotensin-II-receptor blocker, OR – odds ratio, CI – confidence interval.**

## Appendix 7: sensitivity analysis for removal of preprints

| Peer-Reviewed Before Study | Subsequently Peer-Reviewed | Not Peer-Reviewed |
|----------------------------|----------------------------|-------------------|
| Cao, J                     | Argenziano, MG             | Benelli, G        |
| Feng, Y                    | Bean, DM                   | Cao, C            |
| Gisondi, P                 | Caraballo, C               | Castro, VM        |
| Guo, T                     | Hong, W                    | Chen, M           |
| Li, J                      | Huh, K                     | Dauchet, L        |
| Li, X                      | Kolin, DA                  | Dooley, H         |
| Mancia, G                  | Kragholm, K                | Feng, Z           |
| Meng, J                    | Lu, X                      | Ip, A             |
| Reynolds, HR               | Michelena, X               | Khawaja, AP       |
| Richardson, S              | Monreal, E                 | Lee, HY           |
| Sánchez-Álvarez, JE        | Robilotti, EV              | Liang, M          |
| Wu, C                      | Shah, SJ                   | Liu, Yingxia      |
| Zhang, P                   | Wang, D                    | Liu, Yanli        |
| Zhou, F                    | Yang, G                    | Lui, GCY          |
| Zhu, L                     | Yi, P                      | Rentsch, CT       |
|                            |                            | Roumier, M        |
|                            |                            | Yan, H            |
|                            |                            | Zeng, Z           |
|                            |                            | Zhang, S          |

## RAAS blockers

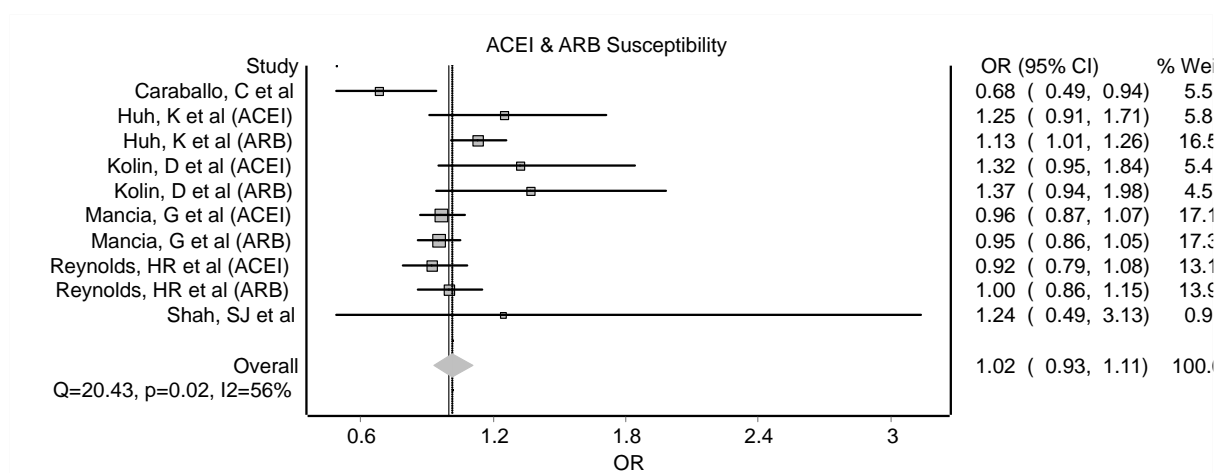

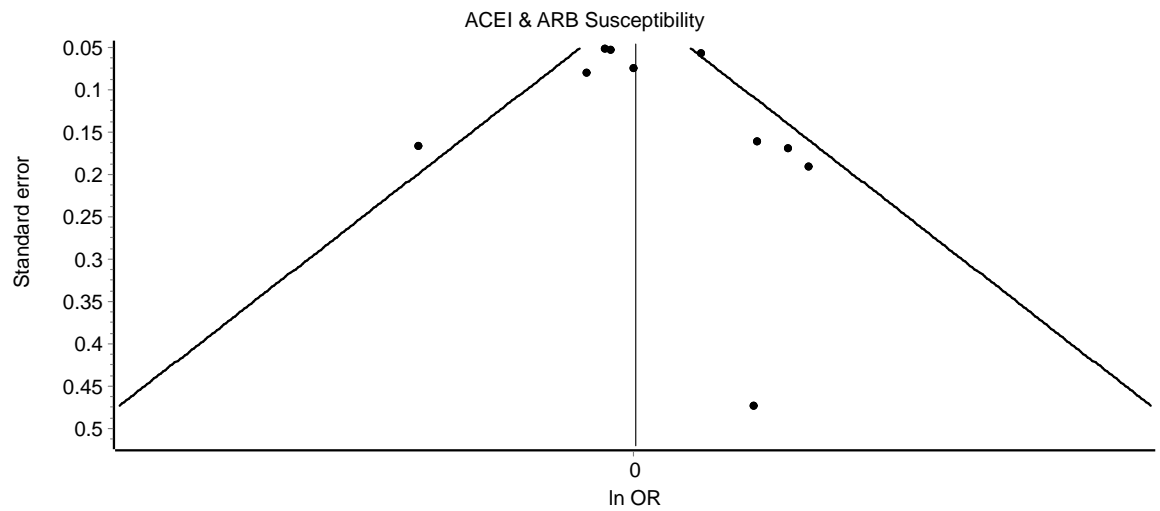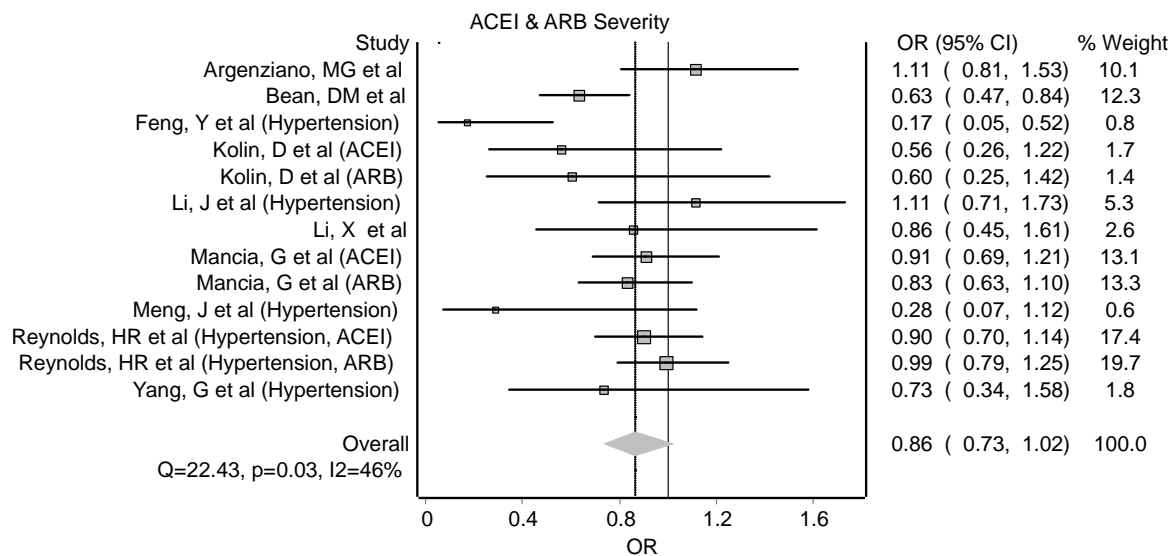



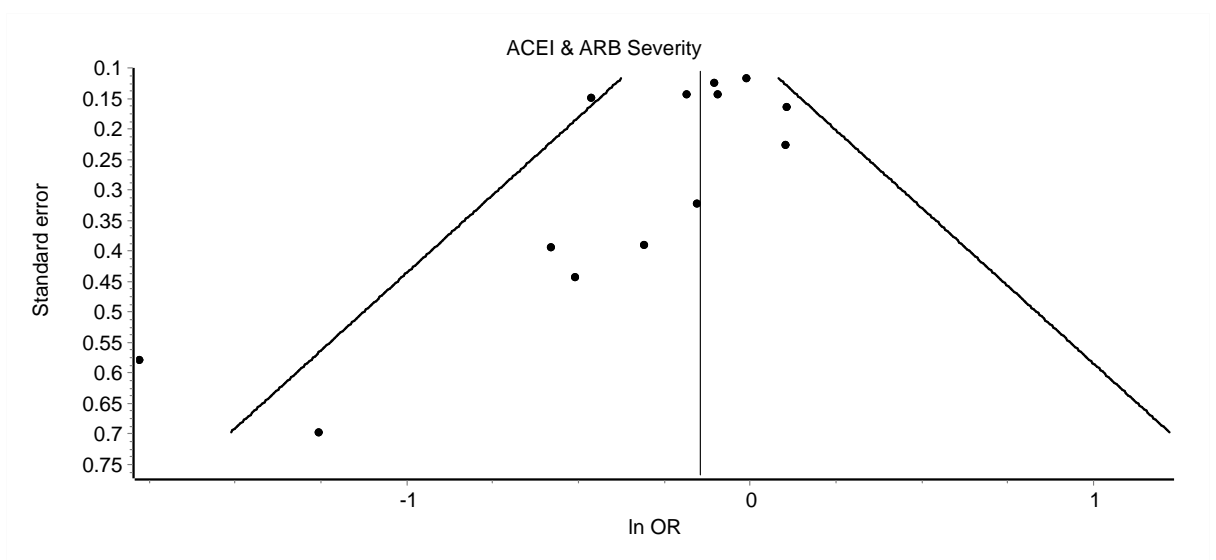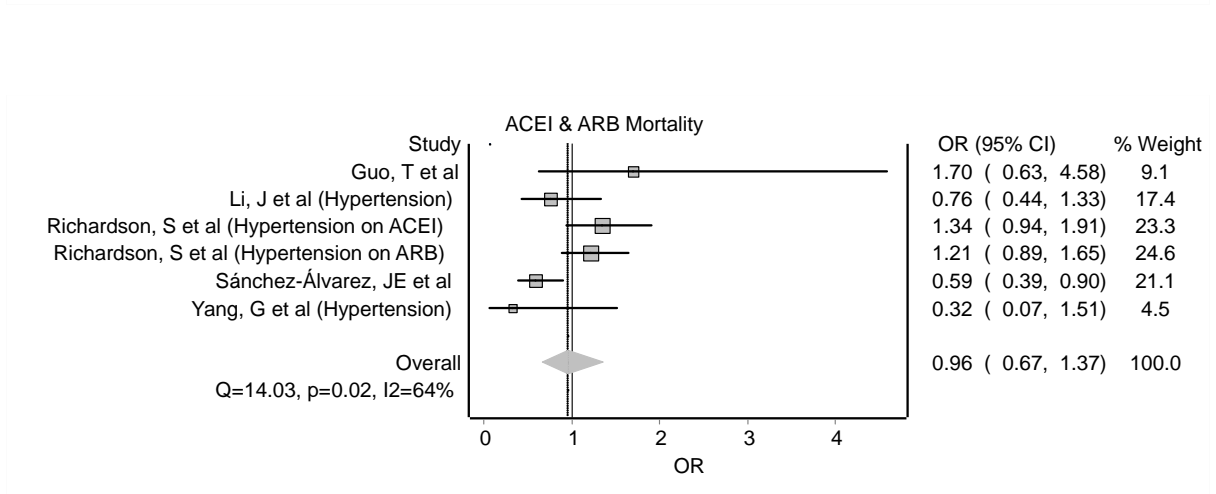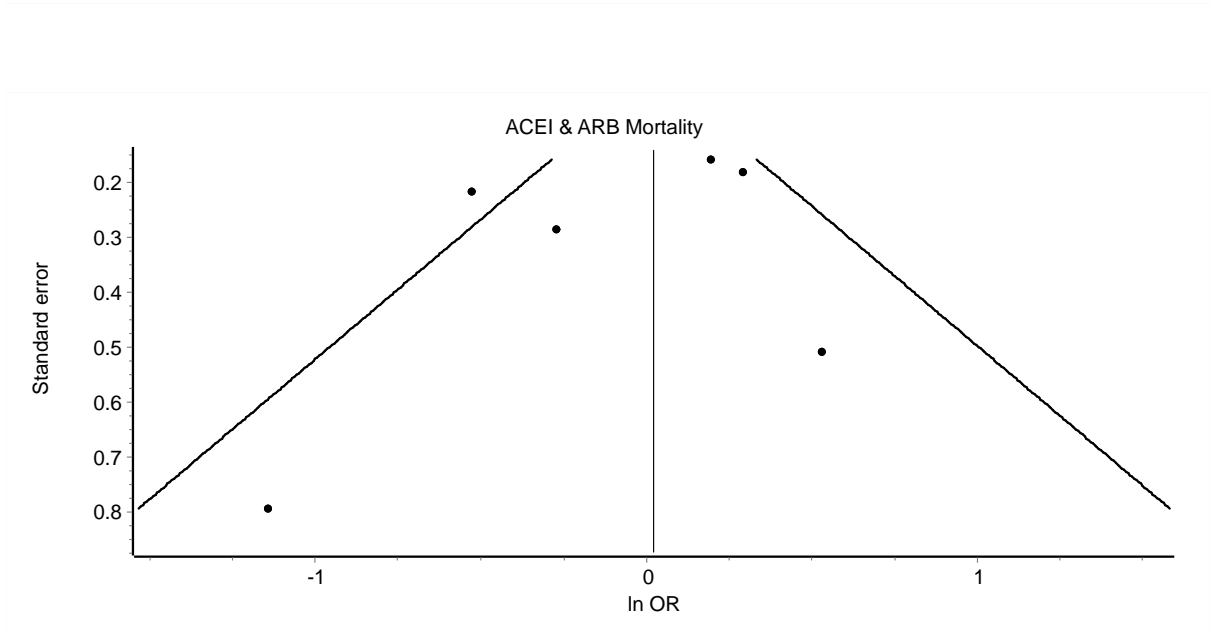

## Corticosteroids

No meta-analysis was performed for susceptibility with corticosteroids.

Severity with acute corticosteroids leaves Wang, D only: OR 2.16 (95% CI 0.49 – 9.43).

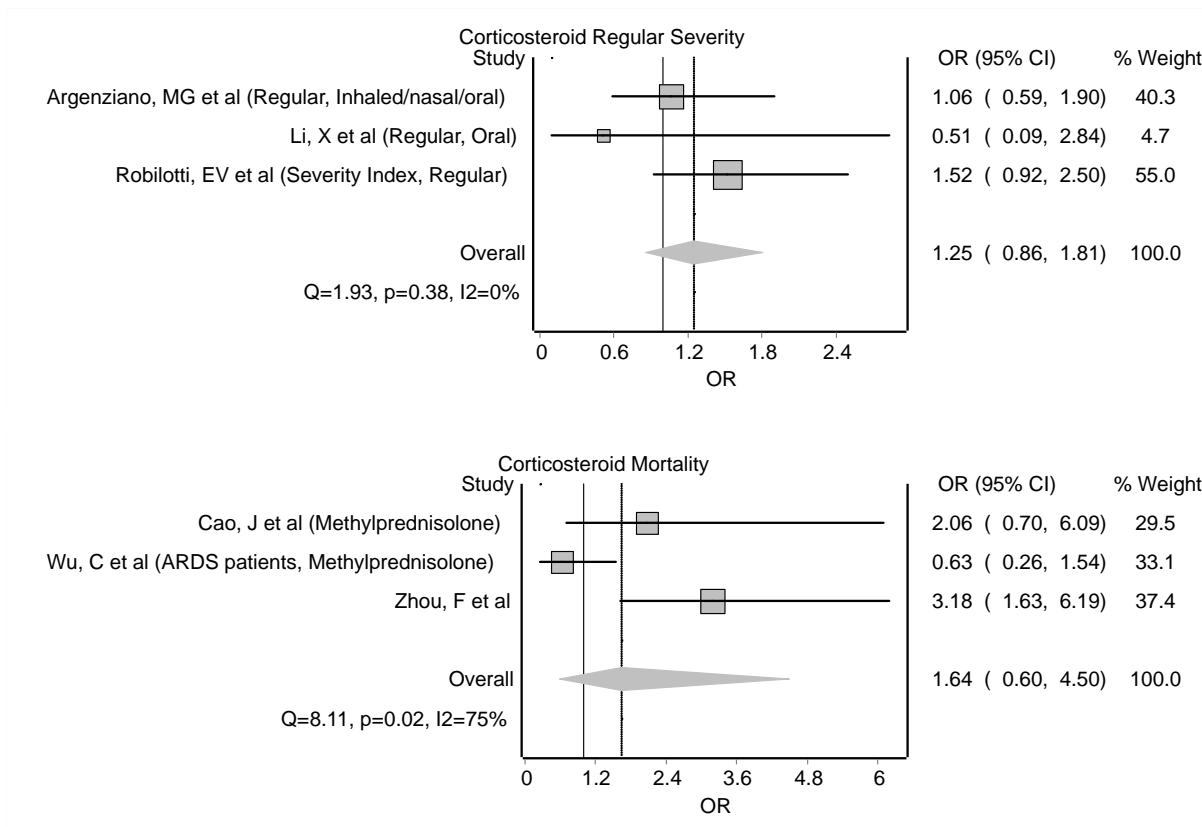

## Immunosuppressants

Susceptibility with immunosuppressants had one study not peer reviewed (Rentsch CT et al.) and sensitivity analysis was run for this already within the study.

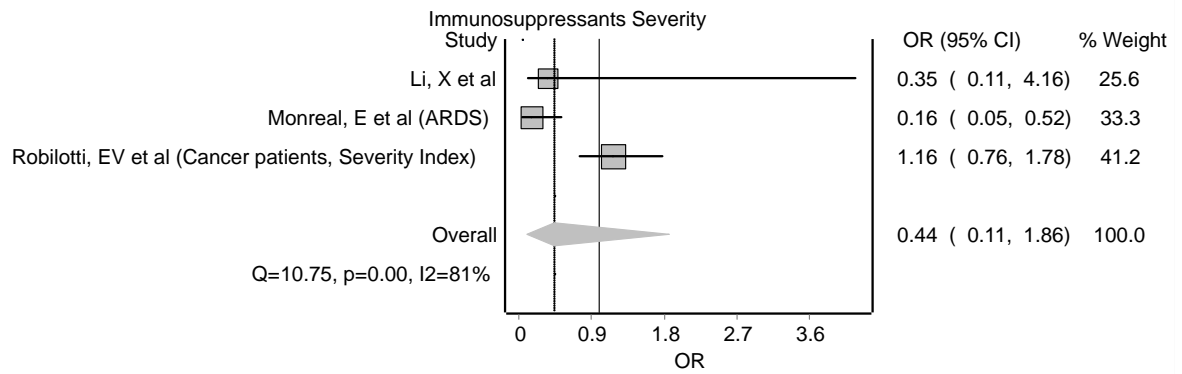

No meta-analysis was performed for mortality related to immunosuppressants.

## NSAIDs, statins, TZDs

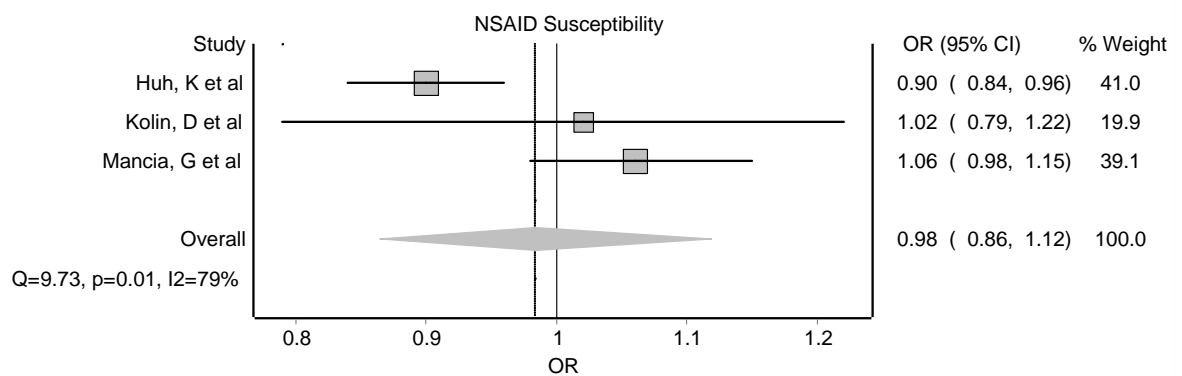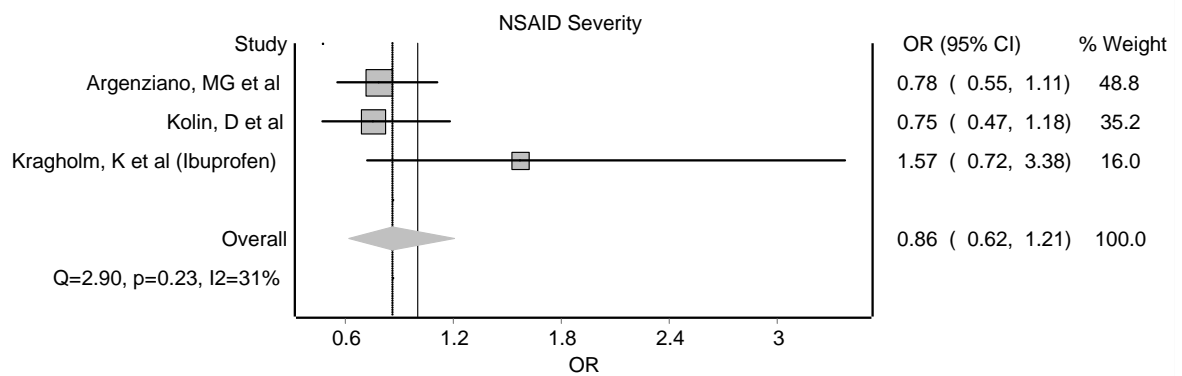

No meta-analyses were performed for mortality related to either NSAIDs, statins or TZDs.

No meta-analyses were performed for severity related to either statins or TZDs.

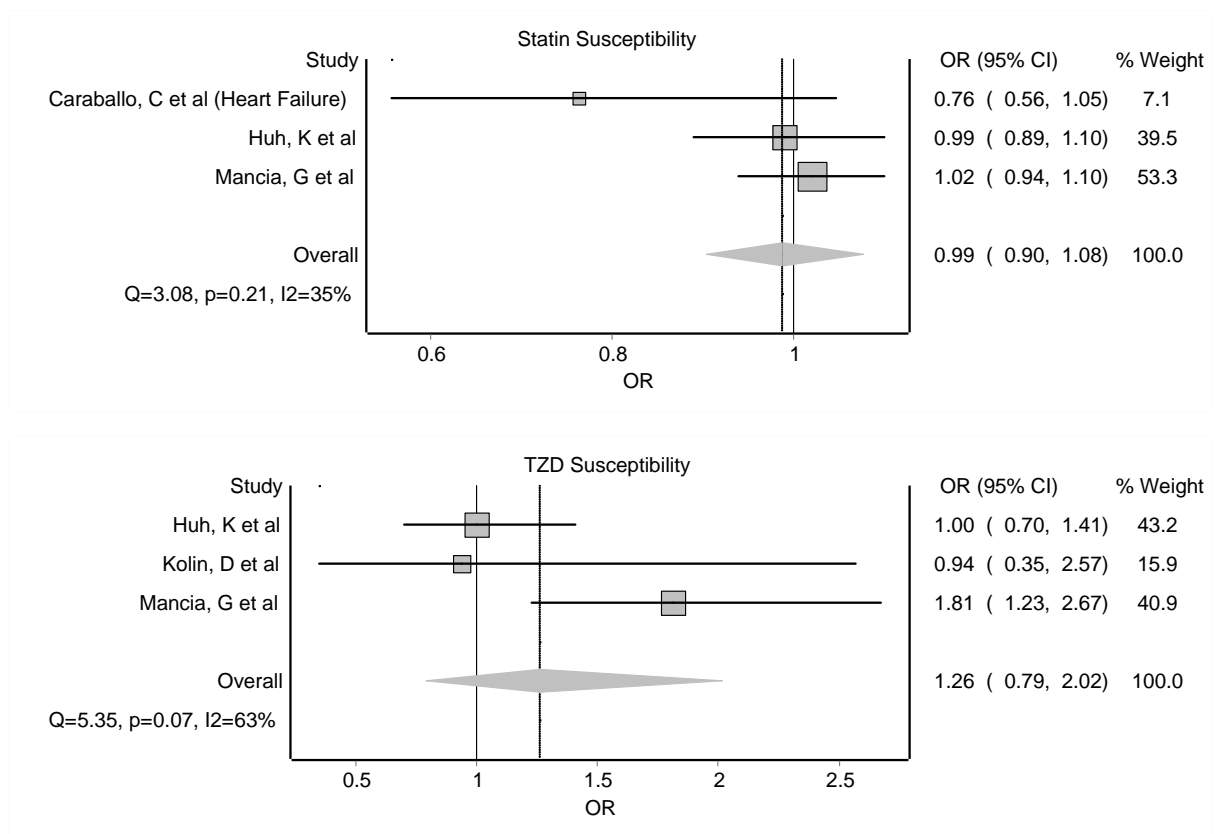

No meta-analyses were performed for MCRAs.
